# Supplementary material for: Exploring the ripple effects of an Australian hospital redevelopment: a protocol for a longitudinal, mixed-methods study
Source: PubMed Central journal article supplement — BMJ Open. 2019 Jul 9;9(7):e027186. doi: 10.1136/bmjopen-2018-027186 (PMC6615845; doi:10.1136/bmjopen-2018-027186), 2019-07-09
Supplement: bmjopen-2018-027186.draft_revisions.pdf [file bmjopen-2018-027186.draft_revisions.pdf]

# BMJ Open

BMJ Open is committed to open peer review. As part of this commitment we make the peer review history of every article we publish publicly available.

When an article is published we post the peer reviewers' comments and the authors' responses online. We also post the versions of the paper that were used during peer review. These are the versions that the peer review comments apply to.

The versions of the paper that follow are the versions that were submitted during the peer review process. They are not the versions of record or the final published versions. They should not be cited or distributed as the published version of this manuscript.

BMJ Open is an open access journal and the full, final, typeset and author-corrected version of record of the manuscript is available on our site with no access controls, subscription charges or pay-per-view fees (<http://bmjopen.bmj.com>).

If you have any questions on BMJ Open's open peer review process please email [info.bmjopen@bmj.com](mailto:info.bmjopen@bmj.com)

# BMJ Open

## Is new always better? Exploring the ripple effects of hospital redevelopment: A study protocol

|                               |                                                                                                                                                                                                                                                                                                                                                                                                                                                                                                                                                                                                                                                                                                                                                                                                                                                                                                     |
|-------------------------------|-----------------------------------------------------------------------------------------------------------------------------------------------------------------------------------------------------------------------------------------------------------------------------------------------------------------------------------------------------------------------------------------------------------------------------------------------------------------------------------------------------------------------------------------------------------------------------------------------------------------------------------------------------------------------------------------------------------------------------------------------------------------------------------------------------------------------------------------------------------------------------------------------------|
| Journal:                      | <i>BMJ Open</i>                                                                                                                                                                                                                                                                                                                                                                                                                                                                                                                                                                                                                                                                                                                                                                                                                                                                                     |
| Manuscript ID                 | bmjopen-2018-027186                                                                                                                                                                                                                                                                                                                                                                                                                                                                                                                                                                                                                                                                                                                                                                                                                                                                                 |
| Article Type:                 | Protocol                                                                                                                                                                                                                                                                                                                                                                                                                                                                                                                                                                                                                                                                                                                                                                                                                                                                                            |
| Date Submitted by the Author: | 10-Oct-2018                                                                                                                                                                                                                                                                                                                                                                                                                                                                                                                                                                                                                                                                                                                                                                                                                                                                                         |
| Complete List of Authors:     | Pomare, Chiara; Macquarie University, Australian Institute of Health Innovation, Centre for Healthcare Resilience and Implementation Science<br>Churruca, Kate; Macquarie University, Australian Institute of Health Innovation, Centre for Healthcare Resilience and Implementation Science<br>Long , Janet; Macquarie University, Australian Institute of Health Innovation, Centre for Healthcare Resilience and Implementation Science<br>Ellis, Louise A.; Macquarie University, Australian Institute of Health Innovation, Centre for Healthcare Resilience and Implementation Science<br>Gardiner, Brett; Macquarie University, Australian Institute of Health Innovation, Centre for Healthcare Resilience and Implementation Science<br>Braithwaite, Jeffrey; Macquarie University, Australian Institute of Health Innovation, Centre for Healthcare Resilience and Implementation Science |
| Keywords:                     | Health & safety < HEALTH SERVICES ADMINISTRATION & MANAGEMENT, HEALTH SERVICES ADMINISTRATION & MANAGEMENT, Quality in health care < HEALTH SERVICES ADMINISTRATION & MANAGEMENT, QUALITATIVE RESEARCH, STATISTICS & RESEARCH METHODS                                                                                                                                                                                                                                                                                                                                                                                                                                                                                                                                                                                                                                                               |
|                               |                                                                                                                                                                                                                                                                                                                                                                                                                                                                                                                                                                                                                                                                                                                                                                                                                                                                                                     |

SCHOLARONE™  
Manuscripts

1  
2  
3  
4  
5  
6  
7  
8 **Is new always better? Exploring the ripple effects of hospital redevelopment: A study**  
9 **protocol**  
10

11  
12  
13 Chiara Pomare\*<sup>1</sup>

14 Kate Churruca<sup>1</sup>

15 Janet C Long<sup>1</sup>

16 Louise A Ellis<sup>1</sup>

17 Brett Gardiner<sup>1</sup>

18 Jeffrey Braithwaite<sup>1</sup>  
19  
20  
21  
22  
23  
24  
25  
26  
27

28 <sup>1</sup>Centre for Healthcare Resilience and Implementation Science, Australian Institute of Health  
29 Innovation, Macquarie University.  
30  
31

32  
33  
34 \*Corresponding author:

35 Ms Chiara Pomare

36 75 Talavera Rd

37  
38  
39 Email: [chiara.pomare@mq.edu.au](mailto:chiara.pomare@mq.edu.au)

40  
41 Phone: 0438 628 690  
42  
43  
44  
45  
46

47 Word count: 2,644  
48  
49  
50  
51  
52  
53  
54  
55  
56  
57  
58  
59  
60

## ARTICLE SUMMARY

### Introduction

Hospital redevelopment projects typically intend to improve hospital functioning and modernise the delivery of care. There is research support for the proposition that redevelopment along evidence-based design principles can lead to improved quality and safety. However, it is not clear how redevelopment influences the wider context of the hospital and its functioning. That is, beyond a limited examination of intended outcomes (e.g. improved patient satisfaction), are there additional consequences (positive, negative, or unintended) occurring within the hospital after the physical environment is changed? Is new always better? The primary purpose of this study is to explore how hospital redevelopment may influence the organisation, staff and patients in both intended and unintended ways.

### Methods and analysis

We propose to conduct a longitudinal, mixed-methods, case-study of a large metropolitan hospital in Australia. The study design consists of a series of measurements over time that are interrupted by the natural intervention of a hospital redevelopment. How hospital redevelopment influences the wider context of the hospital will be assessed in six domains: expectations and reflections of hospital redevelopment, organisational culture, staff interactions, staff wellbeing, efficiency of care delivery, and patient experience. Methods of data collection include: a hospital-wide staff survey, semi-structured interviews, a network survey, a patient experience survey, analysis of routinely-collected hospital data, and observations. Two wards in the hospital not involved in the redevelopment will act as controls. Data will be analysed using thematic, statistical, and network analyses respectively, for the qualitative, quantitative, and relational data.

### Ethics and dissemination

The study has been reviewed and approved by the relevant Ethics Committee in New South Wales, Australia. The results will be actively disseminated through peer-reviewed journals, conference presentations, and in report format to the stakeholders.

### Strengths and limitations of this study

- This study will be the first of its kind to explore how hospital redevelopment may influence the organisation, staff and patients in both intended and unintended ways.
- The project design, including the development of tools, was conducted in collaboration with the hospital under investigation.
- A key strength of the study is the use of mixed-methods and multiple time points of data collection.
- A limitation of the study is that findings may be specific to the hospital under investigation.

## Is new always better? Exploring the ripple effects of hospital redevelopment: A study protocol

### BACKGROUND

Healthcare systems worldwide are facing significant challenges to their long-term sustainability and the delivery of safe, effective, quality care.[1-3] Ageing populations, increasing costs of medical advances, issues with health workforce retention, outdated and inadequate infrastructure, concerns about the quality and safety of health services, and wasteful spending are some of the many challenges facing contemporary healthcare systems.[1, 4, 5] For hospitals, as healthcare institutions providing in-patient treatment 24 hours a day, seven days a week, one of their major challenges lies with ageing populations and overall population growth. Indeed, hospitals worldwide are experiencing a higher incidence of elderly people with greater demand for hospital services and hospital beds.[4, 6]. One way to respond to this challenge is through hospital expansion, redevelopment and modernisation.

The redevelopment of hospitals in high-income countries appears to be increasingly common,[e.g. 7, 8] for several reasons. First, hospitals must evolve and adapt to match the changing healthcare needs of the communities they service.[9] Indeed, hospitals everywhere are challenged to meet the demands of ageing populations and overall population growth; expansion through hospital redevelopment is a way to resolve consequent issues such as inadequate infrastructure. Second, hospitals must adapt to changing trends and technological advances in medicine. For example, the use of mechanical lifters at the bedside,[10] or point-of-care testing,[11] may require reconfiguration of beds in the ward. Third, hospital redevelopment may take place when existing infrastructure is found to compromise staff safety or infection control for patients. For example, the redevelopment of operating theatres to include laminar flow was a deliberate strategy aimed at reducing infection rates.[12]

Another reason for hospital redevelopment lies in the well-documented association between an aesthetically appealing hospital environment and positive outcomes.[13-16] To this end, stakeholders may make design decisions on the basis of evidence, to improve not only the physical appearance, but the functioning of the hospital, including: improved quality of care, patient and staff satisfaction, and financial savings.[13] For example, a post-occupancy study into the development of a garden in a paediatric hospital found an increase in patient and staff satisfaction.[17] In another study of redevelopment, patients were more likely to report shorter perceived waiting times and better perceived staff interactions when in a more attractive waiting room, compared to patients in a less attractive waiting room.[18]

While the literature suggests that redevelopment projects and the implementation of new design features in hospitals are associated with improved outcomes for staff, patients, and the broader organisation,[19] these outcomes have only been addressed in a linear frame.

1  
2  
3 This means hospital redevelopment has typically been assessed by evaluating how one  
4 feature (e.g. a new garden) impacts one intended outcome (e.g. satisfaction), rather than  
5 exploring possible unintended consequences of changing the hospital system. This suggests  
6 that there is a need for a more indepth examination of the potential ripple effects of a  
7 hospital redevelopment. This is particularly important given how interconnected and  
8 complex hospital systems are.[20, 21]  
9

10  
11 Healthcare and healthcare organisations have been described as complex adaptive systems,  
12 characterised by non-linear and often unpredictable processes.[22, 23] In introducing a  
13 potentially large long-term change (and short-term disruption) as hospital redevelopment  
14 into a complex interconnected system, this perspective highlights that we need to look  
15 beyond just the intended or desired outcomes of hospital redevelopment. In taking a  
16 complex systems perspective to examine how redevelopment may influence the hospital,  
17 we recognise that we cannot isolate single factors (e.g. patient satisfaction). Rather, we  
18 need to consider the influence on many complex and interconnected levels and agents of  
19 the hospital system.[19] For example, one potential factor that could be unintentionally  
20 influenced by hospital redevelopment is the way staff interact with one another and  
21 patients. Researchers have suggested that we know little about the role of the hospital  
22 environment in supporting or restricting collaborative ways of working among staff.[13]  
23 Therefore, rather than assuming that the redevelopment of hospitals will only lead to a  
24 particular intended outcome, we argue there is a need to consider the unintended ripple  
25 effects and widespread influences of introducing an environment change into this complex  
26 system. Based on these issues, we pose the question: is new always better? Beyond the  
27 targeted outcome under investigation, do we really know what happens within the hospital  
28 after the physical environment is comprehensively changed?  
29  
30  
31  
32  
33

## 34 **METHODS AND ANALYSIS**

### 35 **Study aim**

36  
37  
38  
39 The present research aims to explore how hospital redevelopment influences the wider  
40 context of the hospital and its functioning. In particular, the study will explore how hospital  
41 redevelopment may influence the organisation, staff and patients in both intended and  
42 unintended ways.  
43

### 44 **Study design**

45  
46  
47 We propose to conduct a pragmatic, longitudinal, mixed-methods case-study of a large  
48 metropolitan hospital in Australia. As illustrated in Figure 1, the design is a mixture of pre-  
49 post data collection points and a series of measurements over time that are interrupted by  
50 the natural intervention of the hospital redevelopment (i.e. interrupted time series (ITS)  
51 data). ITS is a quasi-experimental method for assessing routinely collected data over evenly  
52 spaced out intervals to assess the impact of change.[24] The combination of these methods  
53 of data collection allows for a rich and dynamic exploration of how hospital redevelopment  
54 influences the organisation, staff and patients, in intended and unintended ways. This  
55  
56  
57  
58  
59  
60

1  
2  
3 includes both a broad analysis of hospital-level data and an in-depth analysis of four specific  
4 wards. These wards were chosen in discussion with hospital executives, to cover wards  
5 undergoing and not undergoing redevelopment during the study. That is, two wards are  
6 moving into a new building during the redevelopment project, one ward will not be moved  
7 into the new building but will remain in its current location, and one ward was moved to a  
8 new building two years prior. In essence, the wards moving are the intervention wards and  
9 those not moving act as controls. The various data collection methods apply to all four  
10 wards.  
11  
12  
13  
14  
15

16 INSERT FIGURE 1 HERE  
17  
18  
19

20 How hospital redevelopment influences the wider context of the hospital will be assessed at  
21 three levels: organisation, staff and patients; and six domains: expectations and reflections,  
22 organisational culture, staff interactions, staff wellbeing, efficiency and patient experience  
23 (Figure 2). These domains will be captured by six methods of data collection: hospital-wide  
24 staff survey, semi-structured interviews, network survey, patient experience survey, analysis  
25 of routinely-collected hospital data, and observations (Table 1). Of these six methods, two  
26 (hospital data and patient experience) will be assessed at a minimum of six observations  
27 points. The other four methods of data collection will be assessed at two time points, pre-  
28 and post- the intervention of hospital redevelopment. Data collection, particularly for  
29 interviews, network survey, and observations, will occur in a sequential manner (e.g. design  
30 of the network survey depends on the analysis of interview data).  
31  
32  
33  
34  
35  
36  
37  
38  
39  
40  
41  
42  
43  
44  
45  
46  
47  
48  
49  
50  
51  
52  
53  
54  
55  
56  
57  
58  
59  
60

INSERT FIGURE 2 HERE

**Table 1.** Domains to be assessed and corresponding methods

| Method                     | Domains                    |                        |                    |                 |            |                    |
|----------------------------|----------------------------|------------------------|--------------------|-----------------|------------|--------------------|
|                            | Expectations & reflections | Organisational culture | Staff interactions | Staff wellbeing | Efficiency | Patient experience |
| Hospital-wide staff survey |                            | x                      |                    | x               |            |                    |
| Semi-structured interviews | x                          |                        | x                  |                 |            |                    |
| Network survey             | x                          | x                      | x                  | x               |            |                    |
| *Patient experience survey | x                          |                        |                    |                 |            | x                  |
| *Hospital data             |                            |                        |                    |                 | x          | x                  |
| Observations               |                            | x                      | x                  |                 | x          |                    |

\* Data captured at multiple time points; all other methods are captured at two time points, pre- and post-intervention.

## Study setting

The project will be conducted at a large metropolitan hospital in New South Wales (NSW), Australia. The intervention under investigation is a hospital redevelopment in which the opening of a new acute services building will see the relocation of several wards. In addition to a broad, hospital-level exploration, four wards were chosen for an in-depth analysis: Maternity; Intensive Care; Surgical; and, Respiratory.

## Study procedures

### Routinely-collected hospital data

Routinely collected hospital data, such as throughput rates and bed occupancy, will be made accessible to the research team. This hospital data will be used to explore indicators of change at the hospital- and ward-levels and make inferences about how hospital redevelopment influences the efficiency of care delivery. This data will be captured at equal monthly intervals, forming part of the ITS analysis.

### Patient experience survey

Patient experience data will be captured using a hospital platform already in place. At present, the hospital under investigation has an online survey platform to collect patient experience data, which can be analysed on the ward level. The present project will tap into



1  
2  
3 this platform in order to explore how hospital redevelopment influences patient experience.  
4 The questions asked are routinely collected and used to examine overall experience of  
5 hospital care. Patient experience survey data will be collected at multiple time points, for  
6 ITS analysis.  
7

### 8 Hospital-wide staff survey 9

10 In NSW, Australia, employees working in the public sector, including public hospitals, are  
11 invited to participate in the 'People Matter Employee Survey'; a validated survey where  
12 employees can express their views and experiences in their workplace.[25] Survey findings  
13 are demarcated by agency, such as by each hospital in the NSW public sector (including the  
14 hospital under investigation). The survey is distributed and completed annually over a one-  
15 month period. Survey responses will be made accessible to the research team in  
16 aggregated, unidentifiable form. This data will be analysed and used to understand the  
17 changes in attitudes and experiences of all hospital staff, at two timepoints, pre- and post-  
18 the redevelopment.  
19  
20  
21

### 22 Semi-structured interviews 23

24 Semi-structured interviews were chosen because they enable an in-depth understanding of  
25 a new area with little previous research.[26] The purpose of the interviews before the  
26 intervention will be to collect information on: (1) the expectations of hospital staff regarding  
27 how hospital redevelopment may influence their work; (2) a detailed understanding of  
28 hospital culture and current ways of working, (3) any uncertainties they may have about the  
29 hospital redevelopment project, and (4) staff predictions of how ways of working with other  
30 staff might change in light of the redevelopment. The questions for the interviews taking  
31 place after the intervention will be similar, but with a focus on reflections on the change,  
32 and perceptions of how the hospital redevelopment may have influenced them personally,  
33 other staff, culture, and ways of working together. Participants eligible for inclusion in the  
34 interviews will be all staff working on the four wards under investigation, either part-time or  
35 full-time. By all staff we mean clinicians, administrative, managerial, and domestic staff.  
36 Findings from these interviews will be used to develop the subsequent network survey and  
37 observational component of the research.  
38  
39  
40  
41  
42

### 43 Network survey 44

45 Surveys are a common tool of data collection used to understand the attitudes and  
46 perceptions of healthcare professionals.[27] Questions in this survey will be partly  
47 dependent upon the analysis of interview data.  
48

### 49 *Part 1: Demographics and other outcomes* 50

51 The first part of the survey will be used to collect demographic data, expectations and  
52 reflections on the hospital redevelopment project, organisational culture, and measures of  
53 staff wellbeing (such as job satisfaction and burnout). The same questions will be used pre-  
54 and post- the intervention.  
55  
56  
57  
58  
59  
60

## Part 2: Social network survey

Part 2 of the survey will consist of a social network survey. Social network research involves the investigation of social structures such as collaboration, through the use of networks and graph theory.[28] This provides a basis to investigate a range of collaborative issues, including silo-working and bottlenecks in communication flow,[29] in order to explore how hospital redevelopment influences patterns of staff interaction. The collection of network data to assess interactions is an established tool[29] used in previous healthcare research.[30, 31]

In this part of the survey, staff will be presented with a list of names of other staff on the ward where they work, and asked to indicate which staff members they work with most closely. Staff will also have the opportunity to list any other names not provided on the list. Given the sequential nature of the study design, the exact wording of the network questions is dependent on the interview findings. The survey will be similar after the intervention, with the exception of additional open-ended questions asking how patterns of interaction may have changed in response to the hospital redevelopment project.

### Observations

Generally speaking, observational data will be used to provide a rich description of how hospital redevelopment influences the ways staff work together. Observational data collection will be complementary to the quantitative data of the network survey and will add explanatory value to understanding how the hospital system may change and evolve over time in response to redevelopment. Using observations in conjunction with social network research, as well as in healthcare research more broadly, helps illuminate taken-for-granted and unintended aspects of collaboration that may not be disclosed in surveys or other forms of data collection.[32] Observations will also provide rich data relating to the culture on the wards and how it might be influenced by redevelopment, which is otherwise difficult to capture in self-report questionnaires. Given the sequential nature of this study, specific observational methods will be designed based on interview and survey findings.

### Data analyses

Interview and observational data will be analysed using the qualitative method of thematic analysis,[33] using an open coding process[34]. Data collection and analysis will occur iteratively; questions used for interviews and guides for observations will be continuously refined and expanded in light of emerging findings. Qualitative data will be analysed using NVivo, Version 11.4, for coding and qualitative data analysis.

For quantitative analysis, demographic and descriptive data (staff wellbeing, organisational culture) collected from the network survey, will be analysed using SPSS Statistics Version 22.0. Relational data from the network survey will be graphically presented using Gephi 0.9.2 software, and analysed using stochastic actor-based models.[35] These social network analysis techniques include the analysis of endogenous (structural, network self-

1  
2  
3 organisation) and exogenous (individual characteristics) variables. Trends in time series data  
4 will be graphically presented using line graphs, and statistically analysed using segmented  
5 regression analysis on SPSS.  
6

### 7 **Integrating results**

8  
9 Qualitative, quantitative and network results from the diverse data collection methods will  
10 be integrated to form an overall picture of ways hospital redevelopment may influence the  
11 organisation, staff and patients in both intended and unintended ways. Data will be  
12 synthesised using a mixed-methods matrix;<sup>[36]</sup> a way to triangulate data and display  
13 findings emerging from each level (patient, staff, organisational) and the various methods of  
14 data collection. The matrix will delineate data for the intervention and control wards to  
15 allow for comparison. Data will be categorised as positive, negative or neutral, pre- and  
16 post-hospital redevelopment. The nature of influence will be classified as either intended or  
17 unintended (e.g. intended that patient satisfaction will increase). Classification of what  
18 changes were intended or unintended will be deduced in consultation with key stakeholders  
19 at the hospital. This will be followed by consideration of where there is agreement, partial  
20 agreement, silence, or dissonance between findings from different methods on different  
21 levels.<sup>[36]</sup>  
22  
23  
24  
25

### 26 **DISCUSSION**

27  
28 This study seeks to explore a significant gap in the literature, namely, how redevelopment  
29 influences the wider context of the hospital and its functioning. This research is timely as  
30 hospital redevelopment projects are ubiquitous and on the rise.<sup>[e.g. 7, 8]</sup> The exploratory  
31 nature of this study enables the identification of unintended influences, positive or  
32 negative, that come from conducting a redevelopment project in the hospital physical  
33 environment. If unintended consequences of hospital redevelopment on the organisation,  
34 staff and patients are revealed, then we may be able to delineate and propose ways to deal  
35 with these factors. These findings may be used to guide policies on how to implement major  
36 hospital redevelopment projects with minimal disruption and awareness of the intended  
37 and unintended effects of this large change.  
38  
39  
40  
41

42 As to limitations, the findings may not be generalisable to all instances of hospital  
43 redevelopment. Another potential limitation lies in the two time-point data collection for  
44 four or the six methods of this study. Detected changes assessed by these methods can, in  
45 some instances, be affected by numerous other factors, such as, seasonal, auto-  
46 correlational and non-stationary biases often found in two-time point longitudinal data.<sup>[24]</sup>  
47 In including ITS data and control wards, this limitation will be addressed as such biases can  
48 be identified when there are numerous time points and varied contexts. Therefore, the  
49 combination of pre-post and ITS data collection along with multi-level analysis of the  
50 complex hospital system is beneficial in the exploration of unintended influences to answer  
51 the question: is new always better?  
52  
53  
54  
55  
56  
57  
58  
59  
60

## ETHICS AND DISSEMINATION

The study has been reviewed and approved by the relevant Ethics Committee in NSW, Australia. There are no known health or safety risks associated with participation in any aspect of the described study. The results will be actively disseminated through peer-reviewed journals, conference presentations, and in report format to the stakeholders.

### Author contributions

All authors contributed to the study concept and study design. CP drafted the manuscript, then all authors read, critically revised and approved the final manuscript.

### Funding

CP was funded by the Australian Government Research Training Program (RTP) PhD Scholarship. JB is supported by multiple grants, including the National Health and Medical Research Council (NHMRC) Partnership Grant for Health Systems Sustainability (ID: 9100002).

### Competing Interests

None declared.

### Abbreviations

NSW New South Wales

ITS Interrupted time series

RTP Research training program

## References

1. World Health Organization, *Everybody's business: strengthening health systems to improve health outcomes: WHO's framework for action*. Geneva: WHO; 2007. 2014.
2. Braithwaite, J, Mannion, R, Matsuyama, Y, et al. *Health systems improvement across the globe: Success stories from 60 countries*: CRC Press, 2017.
3. Braithwaite, J, Matsuyama, Y, and Johnson, J. *Healthcare reform, quality and safety: perspectives, participants, partnerships and prospects in 30 countries*: CRC Press, 2017.
4. Morris, M, *Global health care outlook: Battling costs while improving care*. 2016, Deloitte.
5. Braithwaite, J, Mannion, R, Matsuyama, Y, et al. *Healthcare Systems: Future Predictions for Global Care*: CRC Press, 2018.
6. Armstrong, BK, Gillespie, JA, Leeder, SR, et al. Challenges in health and health care for Australia. *Medical Journal of Australia*, 2007; 187(9): 485.
7. Ritchie, E, NSW budget 2017: 'hospital building boom' at heart of \$23bn deal, in *The Australian*. 2017.
8. Carpenter, D and Hoppszallern, S. 2006 hospital building report. The boom goes on. *Hospitals & health networks*, 2006; 80(3): 48-50, 52-4, 2.
9. McKee, M and Healy, J. The role of the hospital in a changing environment. *Bulletin of the World Health Organization*, 2000; 78: 803-810.
10. SANDOZ. *Changing societies, changing healthcare needs: three demographic trends shaping the future of medical services*. Stories 2017; Available from: <https://www.sandoz.com/stories/system-capacity-building/changing-societies-and-healthcare-needs-three-demographic-trends>.
11. Junker, R, Schlebusch, H, and Luppia, PB. Point-of-care testing in hospitals and primary care. *Deutsches Ärzteblatt International*, 2010; 107(33): 561.
12. McHugh, S, Hill, A, and Humphreys, H. Laminar airflow and the prevention of surgical site infection. More harm than good? *The Surgeon*, 2015; 13(1): 52-58.
13. Joseph, A and Kirk Hamilton, D. The Pebble Projects: coordinated evidence-based case studies. *Building Research & Information*, 2008; 36(2): 129-145.
14. Ulrich, RS, Zimring, C, Zhu, X, et al. A review of the research literature on evidence-based healthcare design. *HERD: Health Environments Research & Design Journal*, 2008; 1(3): 61-125.

15. Schweitzer, M, Gilpin, L, and Frampton, S. Healing spaces: elements of environmental design that make an impact on health. *Journal of Alternative & Complementary Medicine*, 2004; 10(Supplement 1): S-71-S-83.
16. Rechel, B, Buchan, J, and McKee, M. The impact of health facilities on healthcare workers' well-being and performance. *International Journal of Nursing Studies*, 2009; 46(7): 1025-1034. DOI: <https://doi.org/10.1016/j.ijnurstu.2008.12.008>.
17. Whitehouse, S, Varni, JW, Seid, M, et al. Evaluating a children's hospital garden environment: Utilization and consumer satisfaction. *Journal of environmental psychology*, 2001; 21(3): 301-314.
18. Becker, F and Douglass, S. The ecology of the patient visit: physical attractiveness, waiting times, and perceived quality of care. *The Journal of ambulatory care management*, 2008; 31(2): 128-141.
19. Ulrich, R, Zimring, C, Quan, X, et al. The role of the physical environment in the hospital of the 21st century: A once-in-a-lifetime opportunity. *Concord, CA: The Center for Health Design*, 2004.
20. Braithwaite, J. Changing how we think about healthcare improvement. *BMJ*, 2018; 361: k2014.
21. Braithwaite, J, Churrua, K, Long, JC, et al. When complexity science meets implementation science: a theoretical and empirical analysis of systems change. *BMC medicine*, 2018; 16(1): 63.
22. Braithwaite, J, Churrua, K, Ellis, LA, et al. Complexity Science in Healthcare- Aspirations, Approaches, Applications and Accomplishments: A White Paper: Macquarie University, 2017.
23. Plsek, PE and Greenhalgh, T. Complexity science: The challenge of complexity in health care. *BMJ: British Medical Journal*, 2001; 323(7313): 625.
24. Lagarde, M. How to do (or not to do)... Assessing the impact of a policy change with routine longitudinal data. *Health policy and planning*, 2011; 27(1): 76-83.
25. NSW Government. *People Matter Employee Survey*. 2018; Available from: <https://www.psc.nsw.gov.au/reports---data/state-of-the-sector/people-matter-employee-survey>.
26. Pope, C, Ziebland, S, and Mays, N. Qualitative research in health care. Analysing qualitative data. *BMJ*, 2000; 320(7227): 114-6.
27. Valentine, MA, Nembhard, IM, and Edmondson, AC. Measuring teamwork in health care settings: a review of survey instruments. *Medical care*, 2015; 53(4): e16-e30.
28. Robins, G. *Doing social network research: Network-based research design for social scientists*: Sage, 2015.

- 1
- 2
- 3 29. Long, JC and Bishop, S. Social Network Research, in Handbook of Research Methods
- 4 in Health Social Sciences, P. Liamputtong, Editor. Springer: Singapore, 2018.
- 5
- 6 30. Long, JC, Cunningham, FC, Wiley, J, et al. Leadership in complex networks: the
- 7 importance of network position and strategic action in a translational cancer
- 8 research network. *Implementation Science*, 2013; 8(1): 122.
- 9
- 10 31. Chan, B, Reeve, E, Matthews, S, et al. Medicine information exchange networks
- 11 among healthcare professionals and prescribing in geriatric medicine wards. *British*
- 12 *journal of clinical pharmacology*, 2017; 83(6): 1185-1196.
- 13
- 14 32. Lingo, EL and O'Mahony, S. Nexus work: Brokerage on creative projects.
- 15 *Administrative Science Quarterly*, 2010; 55(1): 47-81.
- 16
- 17 33. Braun, V and Clarke, V. Using thematic analysis in psychology. *Qualitative Research in*
- 18 *Psychology*, 2006; 3(2): 77-101. DOI: 10.1191/1478088706qp063oa.
- 19
- 20 34. Newell, R and Burnard, P. A pragmatic approach to qualitative data analysis.
- 21 Hoboken, NJ: Wiley-Blackwell, 2010.
- 22
- 23 35. Lusher, D, Koskinen, J, and Robins, G. Exponential random graph models for social
- 24 networks: Theory, methods, and applications: Cambridge University Press, 2012.
- 25
- 26 36. O'Cathain, A, Murphy, E, and Nicholl, J. Three techniques for integrating data in
- 27 mixed methods studies. *Bmj*, 2010; 341: c4587.
- 28
- 29
- 30
- 31
- 32
- 33
- 34
- 35
- 36
- 37
- 38
- 39
- 40
- 41
- 42
- 43
- 44
- 45
- 46
- 47
- 48
- 49
- 50
- 51
- 52
- 53
- 54
- 55
- 56
- 57
- 58
- 59
- 60

1  
2  
3 **FIGURE LEGENEDS**

4  
5 **Figure 1.** Data collection points over time

6  
7 **Figure 2.** Domains to be assessed

8  
9  
10  
11  
12  
13  
14  
15  
16  
17  
18  
19  
20  
21  
22  
23  
24  
25  
26  
27  
28  
29  
30  
31  
32  
33  
34  
35  
36  
37  
38  
39  
40  
41  
42  
43  
44  
45  
46  
47  
48  
49  
50  
51  
52  
53  
54  
55  
56  
57  
58  
59  
60

For peer review only



1  
2  
3  
4  
5  
6  
7  
8  
9  
10  
11  
12  
13  
14  
15  
16  
17  
18  
19  
20  
21  
22  
23  
24  
25  
26  
27  
28  
29  
30  
31  
32  
33  
34  
35  
36  
37  
38  
39  
40  
41  
42  
43  
44  
45  
46  
47  
48  
49  
50  
51  
52  
53  
54  
55  
56  
57  
58  
59  
60

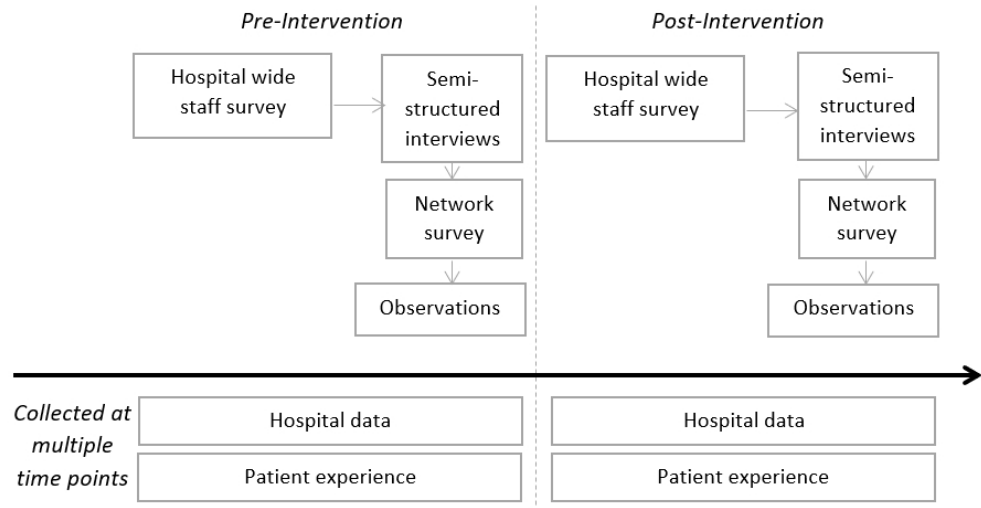

Figure 1. Data collection points over time

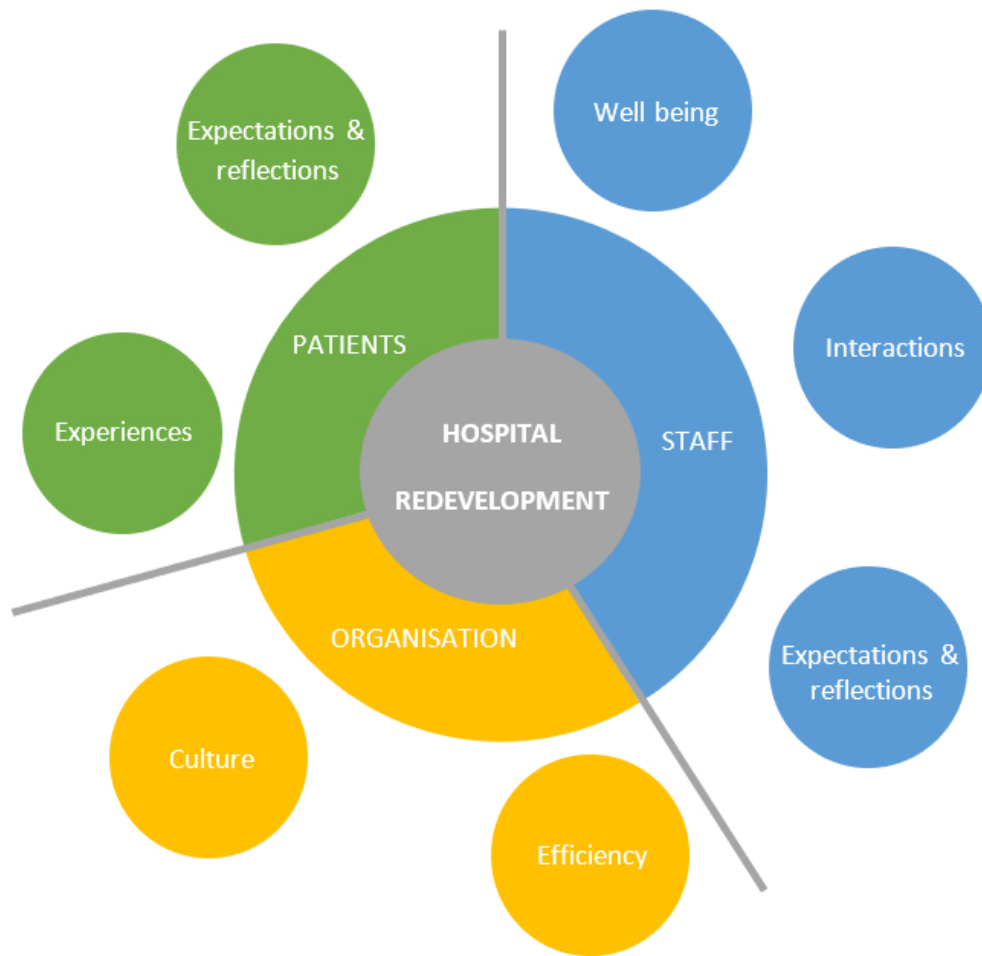

Figure 2. Domains to be assessed

# BMJ Open

## Exploring the ripple effects of an Australia hospital redevelopment: A protocol for a longitudinal, mixed-methods study

|                                 |                                                                                                                                                                                                                                                                                                                                                                                                                                                                                                                                                                                                                                                                                                                                                                                                                                                                                                     |
|---------------------------------|-----------------------------------------------------------------------------------------------------------------------------------------------------------------------------------------------------------------------------------------------------------------------------------------------------------------------------------------------------------------------------------------------------------------------------------------------------------------------------------------------------------------------------------------------------------------------------------------------------------------------------------------------------------------------------------------------------------------------------------------------------------------------------------------------------------------------------------------------------------------------------------------------------|
| Journal:                        | <i>BMJ Open</i>                                                                                                                                                                                                                                                                                                                                                                                                                                                                                                                                                                                                                                                                                                                                                                                                                                                                                     |
| Manuscript ID                   | bmjopen-2018-027186.R1                                                                                                                                                                                                                                                                                                                                                                                                                                                                                                                                                                                                                                                                                                                                                                                                                                                                              |
| Article Type:                   | Protocol                                                                                                                                                                                                                                                                                                                                                                                                                                                                                                                                                                                                                                                                                                                                                                                                                                                                                            |
| Date Submitted by the Author:   | 14-Feb-2019                                                                                                                                                                                                                                                                                                                                                                                                                                                                                                                                                                                                                                                                                                                                                                                                                                                                                         |
| Complete List of Authors:       | Pomare, Chiara; Macquarie University, Australian Institute of Health Innovation, Centre for Healthcare Resilience and Implementation Science<br>Churruca, Kate; Macquarie University, Australian Institute of Health Innovation, Centre for Healthcare Resilience and Implementation Science<br>Long , Janet; Macquarie University, Australian Institute of Health Innovation, Centre for Healthcare Resilience and Implementation Science<br>Ellis, Louise A.; Macquarie University, Australian Institute of Health Innovation, Centre for Healthcare Resilience and Implementation Science<br>Gardiner, Brett; Macquarie University, Australian Institute of Health Innovation, Centre for Healthcare Resilience and Implementation Science<br>Braithwaite, Jeffrey; Macquarie University, Australian Institute of Health Innovation, Centre for Healthcare Resilience and Implementation Science |
| <b>Primary Subject Heading</b>: | Health services research                                                                                                                                                                                                                                                                                                                                                                                                                                                                                                                                                                                                                                                                                                                                                                                                                                                                            |
| Secondary Subject Heading:      | Health services research, Qualitative research, Research methods                                                                                                                                                                                                                                                                                                                                                                                                                                                                                                                                                                                                                                                                                                                                                                                                                                    |
| Keywords:                       | Health & safety < HEALTH SERVICES ADMINISTRATION & MANAGEMENT, HEALTH SERVICES ADMINISTRATION & MANAGEMENT, Quality in health care < HEALTH SERVICES ADMINISTRATION & MANAGEMENT, QUALITATIVE RESEARCH, STATISTICS & RESEARCH METHODS                                                                                                                                                                                                                                                                                                                                                                                                                                                                                                                                                                                                                                                               |
|                                 |                                                                                                                                                                                                                                                                                                                                                                                                                                                                                                                                                                                                                                                                                                                                                                                                                                                                                                     |

SCHOLARONE™  
Manuscripts

1  
2  
3  
4  
5  
6  
7  
8  
9  
10  
11  
12  
13  
14  
15  
16  
17  
18  
19  
20  
21  
22  
23  
24  
25  
26  
27  
28  
29  
30  
31  
32  
33  
34  
35  
36  
37  
38  
39  
40  
41  
42  
43  
44  
45  
46  
47  
48  
49  
50  
51  
52  
53  
54  
55  
56  
57  
58  
59  
60

**Exploring the ripple effects of an Australia hospital redevelopment: A protocol for a longitudinal, mixed-methods study**

Chiara Pomare\*<sup>1</sup>

Kate Churruca<sup>1</sup>

Janet C Long<sup>1</sup>

Louise A Ellis<sup>1</sup>

Brett Gardiner<sup>1</sup>

Jeffrey Braithwaite<sup>1</sup>

<sup>1</sup>Centre for Healthcare Resilience and Implementation Science, Australian Institute of Health Innovation, Macquarie University.

\*Corresponding author:

Ms Chiara Pomare

75 Talavera Rd

Email: [chiara.pomare@mq.edu.au](mailto:chiara.pomare@mq.edu.au)

Phone: 0438 628 690

Word count: 2,917

## ARTICLE SUMMARY

### Introduction

Hospital redevelopment projects typically intend to improve hospital functioning and modernise the delivery of care. There is research support for the proposition that redevelopment along evidence-based design principles can lead to improved quality and safety. However, it is not clear how redevelopment influences the wider context of the hospital and its functioning. That is, beyond a limited examination of intended outcomes (e.g. improved patient satisfaction), are there additional consequences (positive, negative, or unintended) occurring within the hospital after the physical environment is changed? Is new always better? The primary purpose of this study is to explore how hospital redevelopment may influence the organisation, staff and patients in both intended and unintended ways.

### Methods and analysis

We propose to conduct a longitudinal, mixed-methods, case-study of a large metropolitan hospital in Australia. The study design consists of a series of measurements over time that are interrupted by the natural intervention of a hospital redevelopment. How hospital redevelopment influences the wider context of the hospital will be assessed in six domains: expectations and reflections of hospital redevelopment, organisational culture, staff interactions, staff wellbeing, efficiency of care delivery, and patient experience. Methods of data collection include: a hospital-wide staff survey, semi-structured interviews, a network survey, a patient experience survey, analysis of routinely-collected hospital data, and observations. A total of four wards will be examined, with two acting as controls. Data will be analysed using thematic, statistical, and network analyses respectively, for the qualitative, quantitative, and relational data.

### Ethics and dissemination

The study has been reviewed and approved by the relevant Ethics Committee in New South Wales, Australia. The results will be actively disseminated through peer-reviewed journals, conference presentations, and in report format to the stakeholders.

### Strengths and limitations of this study

- This study will be the first of its kind to explore how hospital redevelopment may influence the organisation, staff and patients in both intended and unintended ways.
- The project design, including the development of tools, was conducted in collaboration with the hospital under investigation.
- A key strength of the study is the use of mixed-methods and multiple time points of data collection.
- A limitation of the study is that findings may be specific to the hospital and the wards under investigation.

## Exploring the ripple effects of an Australia hospital redevelopment: A protocol for a longitudinal, mixed-methods study

### BACKGROUND

Healthcare systems worldwide are facing significant challenges to their long-term sustainability and the delivery of safe, effective, quality care.[1-3] Ageing populations, increasing costs of medical advances, issues with health workforce retention, outdated and inadequate infrastructure, concerns about the quality and safety of health services, and wasteful spending are some of the many challenges facing contemporary healthcare systems.[1, 4, 5] For hospitals, as healthcare institutions providing in-patient treatment 24 hours a day, seven days a week, one of their major challenges lies with ageing populations and overall population growth. Indeed, hospitals worldwide are experiencing a higher incidence of elderly people with greater demand for hospital services and hospital beds.[4, 6]. One way to respond to this challenge is through hospital expansion, redevelopment and modernisation.

The redevelopment of hospitals in high-income countries appears to be increasingly common,[e.g. 7, 8] for several reasons. First, hospitals must evolve and adapt to match the changing healthcare needs of the communities they service.[9] Hospitals everywhere are challenged to meet the demands of ageing populations and overall population growth; expansion through hospital redevelopment is a way to resolve consequent issues such as inadequate infrastructure. Second, hospitals must adapt to changing trends and technological advances in medicine. For example, the use of mechanical lifters at the bedside,[10] or point-of-care testing,[11] may require reconfiguration of beds in the ward. Third, hospital redevelopment may take place when existing infrastructure is found to compromise staff safety or infection control for patients. For example, the redevelopment of operating theatres to include laminar flow was a deliberate strategy aimed at reducing infection rates.[12] Another reason for hospital redevelopment lies in the well-documented association between an aesthetically appealing hospital environment and positive outcomes.[13-16] To this end, stakeholders may make design decisions on the basis of evidence, to improve not only the physical appearance, but the functioning of the hospital, including: improved quality of care, patient and staff satisfaction, and financial savings.[13]

While the literature suggests that redevelopment projects and the implementation of new design features in hospitals are associated with improved outcomes for staff, patients, and the broader organisation,[17] these outcomes have only been addressed in a linear frame. This means hospital redevelopment has typically been assessed by evaluating how one feature (e.g. a new garden) impacts one intended outcome (e.g. satisfaction), rather than exploring possible unintended consequences of changing the hospital system. This suggests that there is a need for a more indepth examination of the potential ripple effects of a hospital redevelopment. This is particularly important given how interconnected and complex hospital systems are.[18, 19]

1  
2  
3 Healthcare and healthcare organisations have been described as complex adaptive systems,  
4 characterised by non-linear and often unpredictable processes.[20, 21] In introducing a  
5 potentially large long-term change (and short-term disruption) as hospital redevelopment  
6 into a complex interconnected system, this perspective highlights that we need to look  
7 beyond just the intended or desired outcomes of hospital redevelopment. In taking a  
8 complex systems perspective to examine how redevelopment may influence the hospital,  
9 we recognise that we cannot isolate single factors (e.g. patient satisfaction). Rather, we  
10 need to consider the influence on many complex and interconnected levels and agents of  
11 the hospital system.[17] For example, one potential factor that could be unintentionally  
12 influenced by hospital redevelopment is the way staff interact with one another and  
13 patients. Researchers have suggested that we know little about the role of the hospital  
14 environment in supporting or restricting collaborative ways of working among staff.[13] This  
15 perspective aligns with recent moves to re-appraise change management theory – to one  
16 that no longer perceives organisational change as planned, uniform and predictable, but an  
17 emergent process in a multi-layered, complex ecosystem that is driven as much from the  
18 bottom up as the top down.[22]

25 Therefore, rather than assuming that the redevelopment of hospitals will only lead to a  
26 particular intended outcome, we argue there is a need to consider the unintended ripple  
27 effects and widespread influences of introducing an organisational change into this complex  
28 system. Based on these issues, we pose the question: is new always better? Beyond the  
29 targeted outcome under investigation, do we really know what happens within the hospital  
30 after the physical environment is comprehensively changed?

## 34 **METHODS AND ANALYSIS**

### 36 **Study aim**

39 The present research aims to explore how hospital redevelopment influences the wider  
40 context of the hospital and its functioning. In particular, the study will explore how hospital  
41 redevelopment may influence the organisation, staff and patients in both intended and  
42 unintended ways.

### 45 **Study design**

47 We propose to conduct a pragmatic, longitudinal, mixed-methods case-study of a large  
48 metropolitan hospital in Australia. As illustrated in Figure 1, the design is a mixture of pre-  
49 post data collection points and a series of measurements over time that are interrupted by  
50 the natural intervention of the hospital redevelopment (i.e. interrupted time series (ITS)  
51 data). ITS is a quasi-experimental method for assessing routinely collected data over evenly  
52 spaced out intervals to assess the impact of change.[23] The combination of these methods  
53 of data collection allows for a rich and dynamic exploration of how hospital redevelopment  
54 influences the organisation, staff and patients, in intended and unintended ways.

1  
2  
3 INSERT FIGURE 1 HERE  
4  
5  
6  
7

8 How hospital redevelopment influences the wider context of the hospital will be assessed at  
9 three levels: organisation, staff and patients; and six domains: expectations and reflections,  
10 organisational culture, staff interactions, staff wellbeing, efficiency and patient experience  
11 (Figure 2). These domains will be captured by six methods of data collection: hospital-wide  
12 staff survey, semi-structured interviews, network survey, patient experience survey, analysis  
13 of routinely-collected hospital data, and observations (Table 1). Of these six methods, two  
14 (hospital data and patient experience) will be assessed at a minimum of six observations  
15 points. The other four methods of data collection will be assessed at two time points, pre-  
16 and post- the intervention of hospital redevelopment. Data collection, particularly for  
17 interviews, network survey, and observations, will occur in a sequential manner (e.g. design  
18 of the network survey depends on the analysis of interview data).  
19  
20  
21  
22  
23  
24  
25  
26  
27  
28  
29  
30  
31  
32  
33  
34  
35  
36  
37  
38  
39  
40  
41  
42  
43  
44  
45  
46  
47  
48  
49  
50  
51  
52  
53  
54  
55  
56  
57  
58  
59  
60

INSERT FIGURE 2 HERE



**Table 1.** Domains to be assessed and corresponding methods

| Method                     | Domains                    |                        |                    |                 |            |                    |
|----------------------------|----------------------------|------------------------|--------------------|-----------------|------------|--------------------|
|                            | Expectations & reflections | Organisational culture | Staff interactions | Staff wellbeing | Efficiency | Patient experience |
| Hospital-wide staff survey |                            | x                      |                    | x               |            |                    |
| Semi-structured interviews | x                          | x                      | x                  |                 |            |                    |
| Network survey             | x                          | x                      | x                  | x               |            |                    |
| *Patient experience survey | x                          |                        |                    |                 |            | x                  |
| *Hospital data             |                            |                        |                    |                 | x          | x                  |
| Observations               |                            |                        | x                  |                 | x          |                    |

\* Data captured at multiple time points; all other methods are captured at two time points, pre- and post-intervention.

## Study setting

The project will be conducted at a public, metropolitan hospital in New South Wales (NSW), Australia. The hospital has between 200 and 500 beds, and is currently undergoing a multimillion-dollar development to meet the growing needs of the community. The redevelopment will see the opening of a new acute services building, the relocation of several wards to this new building, increases in resources (equipment, staffing), and the adoption of new approaches: new ways of working and new e-medical systems of care delivery. These changes are set to be in place by mid-2019. This study includes both a broad analysis of hospital-level data and an in-depth analysis of four specific wards; two wards moving into the new building during the redevelopment project (Maternity and Intensive Care Unit), one ward will not be moved into the new building but will remain in its current location (Surgical), and one ward was moved to a new building two years prior (Respiratory). In essence, the wards moving are the intervention wards and those not moving act as controls. Chosen wards were equivalent in bed, and staff numbers. Although these wards differ somewhat in the type of care delivered, they are deemed to be sufficiently homogeneous; they were chosen in discussion with hospital executives, to cover wards undergoing and not undergoing redevelopment during the study.

## Study procedures

### Routinely-collected hospital data

1  
2  
3 Routinely collected hospital data, such as throughput rates and bed occupancy, will be made  
4 accessible to the research team. This hospital data will be used to explore indicators of  
5 change at the hospital- and ward-levels and make inferences about how hospital  
6 redevelopment influences the efficiency of care delivery. This data will be captured at equal  
7 monthly intervals, forming part of the ITS analysis.  
8  
9

#### 10 Patient experience survey

11  
12  
13 Patient experience data will be captured using a hospital platform already in place. At  
14 present, the hospital under investigation has an online survey platform to collect patient  
15 experience data, which can be analysed on the ward level. The present project will tap into  
16 this platform in order to explore how hospital redevelopment influences patient experience.  
17 The questions asked are routinely collected and used to examine overall experience of  
18 hospital care. The survey will include the previously validated short form Picker Patient  
19 Experience Questionnaire-15 (PPE-15) for measuring patient perceived quality of  
20 hospitalization. PPE-15 measures patients' subjective experience of care during their  
21 hospital stay.[24] This survey data will be collected at multiple time points, for ITS analysis.  
22  
23  
24

#### 25 Hospital-wide staff survey

26  
27  
28 In NSW, Australia, employees working in the public sector, including public hospitals, are  
29 invited to participate in the 'People Matter Employee Survey'; a validated survey where  
30 employees can express their views and experiences in their workplace.[25] Survey findings  
31 are demarcated by agency, such as by each hospital in the NSW public sector (including the  
32 hospital under investigation). The survey is distributed and completed annually over a one-  
33 month period. The response rate of the last annual survey for this hospital was 39%, slightly  
34 higher than the relevant local health district and an increase over previous years. Survey  
35 responses will be made accessible to the research team in aggregated, unidentifiable form.  
36 This data will be analysed and used to understand the changes in attitudes and experiences  
37 of all hospital staff, at two timepoints, pre- and post- the redevelopment.  
38  
39  
40

#### 41 Semi-structured interviews

42  
43  
44 Semi-structured interviews were chosen because they enable an in-depth understanding of  
45 a new area with little previous research.[26] The purpose of the interviews before the  
46 intervention will be to collect information on: (1) a detailed understanding of the hospital's  
47 culture and current ways of working; (2) the expectations of hospital staff regarding how the  
48 ongoing hospital redevelopment might influence their work; (3) any uncertainties they had  
49 about the hospital redevelopment project, and (4) staff predictions of how ways of working  
50 with other staff might change in light of the redevelopment. The questions for the  
51 interviews taking place after the intervention will be similar, but with a focus on reflections  
52 on the change, and perceptions of how the hospital redevelopment may have influenced  
53 them personally, other staff, culture, and ways of working together. Participants eligible for  
54 inclusion in the interviews will be all staff working on the four wards under investigation,  
55 either part-time or full-time. By all staff we mean clinicians, administrative, managerial, and  
56 domestic staff. The number of interview participants will be approximately 40 (at each time  
57  
58  
59  
60

1  
2  
3 point), with a minimum of 10 participants per ward or until data saturation is reached. Semi-  
4 structured interviews will be conducted by the first author in private settings at the  
5 participants' place of work (in ward interview rooms or private offices). At times where  
6 participants are unable to meet the researcher in person, interviews will be conducted over  
7 the phone in similar private settings. Findings from these interviews will be used to develop  
8 the subsequent network survey and observational component of the research.  
9  
10

## 11 12 Network survey

13  
14 Surveys are a common tool of data collection used to understand the attitudes and  
15 perceptions of healthcare professionals.[27] Questions in this survey will be partly  
16 dependent upon the analysis of interview data.  
17  
18

### 19 *Part 1: Demographics and other outcomes*

20  
21 The first part of the survey will be used to collect demographic data, expectations and  
22 reflections on the hospital redevelopment project, organisational culture, and measures of  
23 staff wellbeing (such as job satisfaction and burnout). The same questions will be used pre-  
24 and post- the intervention.  
25  
26

### 27 *Part 2: Social network survey*

28  
29 Part 2 of the survey will consist of a social network survey. Social network research involves  
30 the investigation of social structures such as collaboration, through the use of networks and  
31 graph theory.[28] This provides a basis to investigate a range of collaborative issues,  
32 including silo-working and bottlenecks in communication flow,[29] in order to explore how  
33 hospital redevelopment influences patterns of staff interaction. The collection of network  
34 data to assess interactions is an established tool[29] used in previous healthcare  
35 research.[30, 31] In this part of the survey, staff will be asked to report which staff members  
36 they work with most closely. Given the sequential nature of the study design, the exact  
37 wording of the network questions is dependent on the interview findings. The survey will be  
38 similar after the intervention, with the exception of additional open-ended questions asking  
39 how patterns of interaction may have changed in response to the hospital redevelopment  
40 project.  
41  
42  
43  
44  
45

## 46 47 Observations

48  
49 Generally speaking, observational data will be used to provide a rich description of how  
50 hospital redevelopment influences the ways staff work together. Observational data  
51 collection will be complementary to the quantitative data of the network survey and will  
52 add explanatory value to understanding how the hospital system may change and evolve  
53 over time in response to redevelopment. Using observations in conjunction with social  
54 network research, as well as in healthcare research more broadly, helps illuminate taken-  
55 for-granted and unintended aspects of collaboration that may not be disclosed in surveys or  
56 other forms of data collection.[32] Observations will also provide rich data relating to the  
57 culture on the wards and how it might be influenced by redevelopment, which is otherwise  
58  
59  
60

1  
2  
3 difficult to capture in self-report questionnaires. Given the sequential nature of this study,  
4 specific observational methods will be designed based on interview and survey findings.  
5

## 6 7 **Data analyses**

8  
9 Interview and observational data will be analysed using the qualitative method of thematic  
10 analysis,[33] using an open coding process[34]. Data collection and analysis will occur  
11 iteratively; questions used for interviews and guides for observations will be continuously  
12 refined and expanded in light of emerging findings. Qualitative data will be analysed using  
13 NVivo, Version 11.4, for coding and qualitative data analysis.  
14  
15

16  
17 For quantitative analysis, demographic and descriptive data (staff wellbeing, organisational  
18 culture) collected from the network survey, will be analysed using SPSS Statistics Version  
19 22.0. Relational data from the network survey will be graphically presented using Gephi  
20 0.9.2 software, and analysed using stochastic actor-based models.[35] These social network  
21 analysis techniques include the analysis of endogenous (structural, network self-  
22 organisation) and exogenous (individual characteristics) variables. Trends in time series data  
23 will be graphically presented using line graphs, and statistically analysed using segmented  
24 regression analysis on SPSS.  
25  
26  
27

## 28 **Integrating results**

29  
30 Qualitative, quantitative and network results from the diverse data collection methods will  
31 be integrated to form an overall picture of ways hospital redevelopment may influence the  
32 organisation, staff and patients in both intended and unintended ways. Data will be  
33 synthesised using a mixed-methods matrix;[36] a way to triangulate data and display  
34 findings emerging from each level (patient, staff, organisational) and the various methods of  
35 data collection. The matrix will delineate data for the intervention and control wards to  
36 allow for comparison. Data will be categorised as positive, negative or neutral, pre- and  
37 post-hospital redevelopment. The nature of influence will be classified as either intended or  
38 unintended (e.g. intended that patient satisfaction will increase). Classification of what  
39 changes were intended or unintended will be deduced in consultation with key stakeholders  
40 at the hospital. This will be followed by consideration of where there is agreement, partial  
41 agreement, silence, or dissonance between findings from different methods on different  
42 levels.[36]  
43  
44  
45  
46  
47  
48

## 49 **Patient and public involvement**

50  
51 The Institute consults with patients, their representatives and the general public regularly to  
52 ensure that adequate input is secured for research projects and programs of research. A key  
53 partner is the Consumers Health Forum of Australia. Patients were not directly involved in  
54 the development of the research question, study design, recruitment or conduct of the  
55 study. However, the staged nature of the study design means that concerns raised by  
56 patients in the survey before the intervention can be used to refine research questions and  
57 methods to assess the effects of hospital redevelopment once the move into the new  
58  
59  
60

1  
2  
3 hospital building takes place. At the end of the study, final results will be disseminated  
4 broadly to patients and the wider public.  
5

## 6 7 **DISCUSSION**

8  
9 This study seeks to explore a significant gap in the literature, namely, how redevelopment  
10 influences the wider context of the hospital and its functioning. This research is timely as  
11 hospital redevelopment projects are ubiquitous and on the rise.[e.g. 7, 8] The exploratory  
12 nature of this case-study enables the identification of unintended influences, positive or  
13 negative, that come from conducting a redevelopment project in the hospital physical  
14 environment. If unintended consequences of hospital redevelopment on the organisation,  
15 staff and patients are revealed, then we may be able to delineate and propose ways to deal  
16 with these factors. These findings may be used to guide policies on how to implement major  
17 hospital redevelopment projects with minimal disruption and awareness of the intended  
18 and unintended effects of this large change.  
19  
20  
21  
22

23 As to limitations, the findings may not be generalisable to all instances of hospital  
24 redevelopment and may be specific to the four wards and one hospital examined in this  
25 study. They were purposively chosen rather than randomised. While findings may not be  
26 generalisable, the qualitative test is credibility and the protocol has been designed to  
27 optimise research credibility at each point. This in-depth case-study provides the  
28 opportunity to uncover theoretical insights into the processes of change in the healthcare  
29 system and how such processes can impact staff, patients, and the organisation. Another  
30 potential limitation lies in the two time-point data collection for four or the six methods of  
31 this study. Detected changes assessed by these methods can, in some instances, be affected  
32 by numerous other factors, such as, seasonal, auto-correlational and non-stationary biases  
33 often found in two-time point longitudinal data.[23] In including ITS data and control wards,  
34 this limitation will be addressed as such biases can be identified when there are numerous  
35 time points and varied contexts. Therefore, the combination of pre-post and ITS data  
36 collection along with multi-level analysis of the complex hospital system is beneficial in the  
37 exploration of unintended influences to answer the question: is new always better?  
38  
39  
40  
41  
42  
43  
44  
45  
46

## 47 **ETHICS AND DISSEMINATION**

48 The study has been reviewed and approved by the relevant Ethics Committee in NSW,  
49 Australia. There are no known health or safety risks associated with participation in any  
50 aspect of the described study. The results will be actively disseminated through peer-  
51 reviewed journals, conference presentations, and in report format to the stakeholders.  
52  
53

## 54 **Author contributions**

55 CP, JB and BG conceptualised the study. CP drafted the initial manuscript, assisted by KC, JL  
56 and LE. All authors contributed to the refinement of the final manuscript.  
57  
58  
59  
60

## Funding

CP was funded by the Australian Government Research Training Program (RTP) PhD Scholarship. JB is supported by multiple grants, including the National Health and Medical Research Council (NHMRC) Partnership Grant for Health Systems Sustainability (ID: 9100002).

## Competing Interests

None declared.

## Data availability

There are no data in this work.

## Abbreviations

NSW New South Wales

ITS Interrupted time series

RTP Research training program

## References

1. World Health Organization, Everybody's business: strengthening health systems to improve health outcomes: WHO's framework for action. Geneva: WHO; 2007. 2014.
2. Braithwaite, J, Mannion, R, Matsuyama, Y, et al. Health systems improvement across the globe: Success stories from 60 countries: CRC Press, 2017.
3. Braithwaite, J, Matsuyama, Y, and Johnson, J. Healthcare reform, quality and safety: perspectives, participants, partnerships and prospects in 30 countries: CRC Press, 2017.
4. Morris, M, Global health care outlook: Battling costs while improving care. 2016, Deloitte.
5. Braithwaite, J, Mannion, R, Matsuyama, Y, et al. Healthcare Systems: Future Predictions for Global Care: CRC Press, 2018.
6. Armstrong, BK, Gillespie, JA, Leeder, SR, et al. Challenges in health and health care for Australia. *Medical Journal of Australia*, 2007; 187(9): 485.
7. Ritchie, E, NSW budget 2017: 'hospital building boom' at heart of \$23bn deal, in *The Australian*. 2017.
8. Carpenter, D and Hoppszallern, S. 2006 hospital building report. The boom goes on. *Hospitals & health networks*, 2006; 80(3): 48-50, 52-4, 2.
9. McKee, M and Healy, J. The role of the hospital in a changing environment. *Bulletin of the World Health Organization*, 2000; 78: 803-810.
10. SANDOZ. *Changing societies, changing healthcare needs: three demographic trends shaping the future of medical services*. Stories 2017; Available from: <https://www.sandoz.com/stories/system-capacity-building/changing-societies-and-healthcare-needs-three-demographic-trends>.
11. Junker, R, Schlebusch, H, and Lupp, PB. Point-of-care testing in hospitals and primary care. *Deutsches Ärzteblatt International*, 2010; 107(33): 561.
12. McHugh, S, Hill, A, and Humphreys, H. Laminar airflow and the prevention of surgical site infection. More harm than good? *The Surgeon*, 2015; 13(1): 52-58.
13. Joseph, A and Kirk Hamilton, D. The Pebble Projects: coordinated evidence-based case studies. *Building Research & Information*, 2008; 36(2): 129-145.
14. Ulrich, RS, Zimring, C, Zhu, X, et al. A review of the research literature on evidence-based healthcare design. *HERD: Health Environments Research & Design Journal*, 2008; 1(3): 61-125.

15. Schweitzer, M, Gilpin, L, and Frampton, S. Healing spaces: elements of environmental design that make an impact on health. *Journal of Alternative & Complementary Medicine*, 2004; 10(Supplement 1): S-71-S-83.
16. Rechel, B, Buchan, J, and McKee, M. The impact of health facilities on healthcare workers' well-being and performance. *International Journal of Nursing Studies*, 2009; 46(7): 1025-1034. DOI: <https://doi.org/10.1016/j.ijnurstu.2008.12.008>.
17. Ulrich, R, Zimring, C, Quan, X, et al. The role of the physical environment in the hospital of the 21st century: A once-in-a-lifetime opportunity. *Concord, CA: The Center for Health Design*, 2004.
18. Braithwaite, J. Changing how we think about healthcare improvement. *BMJ*, 2018; 361: k2014.
19. Braithwaite, J, Churrua, K, Long, JC, et al. When complexity science meets implementation science: a theoretical and empirical analysis of systems change. *BMC medicine*, 2018; 16(1): 63.
20. Braithwaite, J, Churrua, K, Ellis, LA, et al. Complexity Science in Healthcare- Aspirations, Approaches, Applications and Accomplishments: A White Paper: Macquarie University, 2017.
21. Plsek, PE and Greenhalgh, T. Complexity science: The challenge of complexity in health care. *BMJ: British Medical Journal*, 2001; 323(7313): 625.
22. Todnem By, R. Organisational change management: A critical review. *Journal of change management*, 2005; 5(4): 369-380.
23. Lagarde, M. How to do (or not to do)... Assessing the impact of a policy change with routine longitudinal data. *Health policy and planning*, 2011; 27(1): 76-83.
24. Jenkinson, C, Coulter, A, and Bruster, S. The Picker Patient Experience Questionnaire: development and validation using data from in-patient surveys in five countries. *International Journal for Quality in Health Care*, 2002; 14(5): 353-358.
25. NSW Government. *People Matter Employee Survey*. 2018; Available from: <https://www.psc.nsw.gov.au/reports---data/state-of-the-sector/people-matter-employee-survey>.
26. Pope, C, Ziebland, S, and Mays, N. Qualitative research in health care. Analysing qualitative data. *BMJ*, 2000; 320(7227): 114-6.
27. Valentine, MA, Nembhard, IM, and Edmondson, AC. Measuring teamwork in health care settings: a review of survey instruments. *Medical care*, 2015; 53(4): e16-e30.
28. Robins, G. *Doing social network research: Network-based research design for social scientists*: Sage, 2015.



- 1
- 2
- 3
- 4 29. Long, JC and Bishop, S. Social Network Research, in Handbook of Research Methods
- 5 in Health Social Sciences, P. Liamputtong, Editor. Springer: Singapore, 2018.
- 6
- 7 30. Long, JC, Cunningham, FC, Wiley, J, et al. Leadership in complex networks: the
- 8 importance of network position and strategic action in a translational cancer
- 9 research network. *Implementation Science*, 2013; 8(1): 122.
- 10
- 11 31. Chan, B, Reeve, E, Matthews, S, et al. Medicine information exchange networks
- 12 among healthcare professionals and prescribing in geriatric medicine wards. *British*
- 13 *journal of clinical pharmacology*, 2017; 83(6): 1185-1196.
- 14
- 15 32. Lingo, EL and O'Mahony, S. Nexus work: Brokerage on creative projects.
- 16 *Administrative Science Quarterly*, 2010; 55(1): 47-81.
- 17
- 18 33. Braun, V and Clarke, V. Using thematic analysis in psychology. *Qualitative Research in*
- 19 *Psychology*, 2006; 3(2): 77-101. DOI: 10.1191/1478088706qp063oa.
- 20
- 21 34. Newell, R and Burnard, P. A pragmatic approach to qualitative data analysis.
- 22 Hoboken, NJ: Wiley-Blackwell, 2010.
- 23
- 24 35. Lusher, D, Koskinen, J, and Robins, G. Exponential random graph models for social
- 25 networks: Theory, methods, and applications: Cambridge University Press, 2012.
- 26
- 27 36. O'Cathain, A, Murphy, E, and Nicholl, J. Three techniques for integrating data in
- 28 mixed methods studies. *Bmj*, 2010; 341: c4587.
- 29
- 30
- 31
- 32
- 33
- 34
- 35
- 36
- 37
- 38
- 39
- 40
- 41
- 42
- 43
- 44
- 45
- 46
- 47
- 48
- 49
- 50
- 51
- 52
- 53
- 54
- 55
- 56
- 57
- 58
- 59
- 60

1  
2  
3 **FIGURE LEGENEDS**  
4

5 **Figure 1.** Data collection points over time  
6

7  
8 **Figure 2.** Domains to be assessed  
9

10  
11  
12  
13  
14  
15  
16  
17  
18  
19  
20  
21  
22  
23  
24  
25  
26  
27  
28  
29  
30  
31  
32  
33  
34  
35  
36  
37  
38  
39  
40  
41  
42  
43  
44  
45  
46  
47  
48  
49  
50  
51  
52  
53  
54  
55  
56  
57  
58  
59  
60

For peer review only

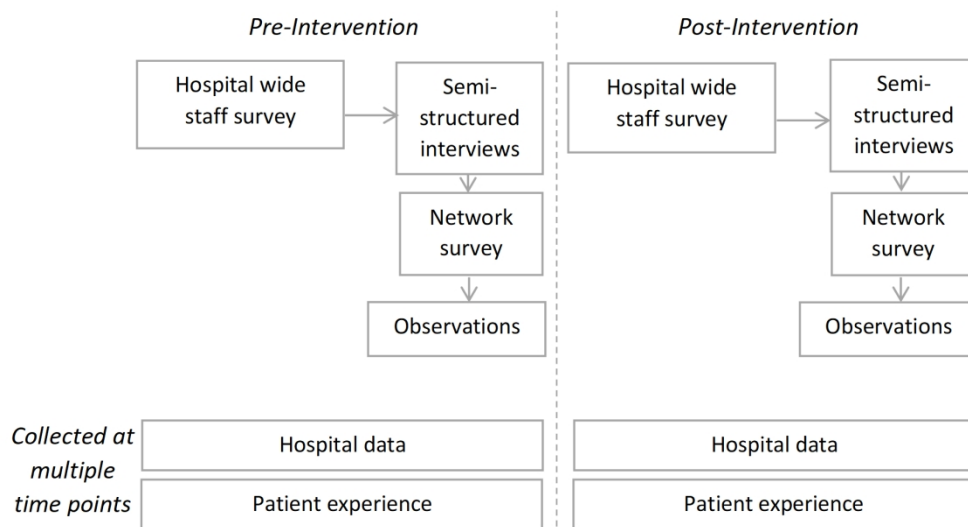

Figure 1. Data collection points over time

163x92mm (300 x 300 DPI)

1  
2  
3  
4  
5  
6  
7  
8  
9  
10  
11  
12  
13  
14  
15  
16  
17  
18  
19  
20  
21  
22  
23  
24  
25  
26  
27  
28  
29  
30  
31  
32  
33  
34  
35  
36  
37  
38  
39  
40  
41  
42  
43  
44  
45  
46  
47  
48  
49  
50  
51  
52  
53  
54  
55  
56  
57  
58  
59  
60

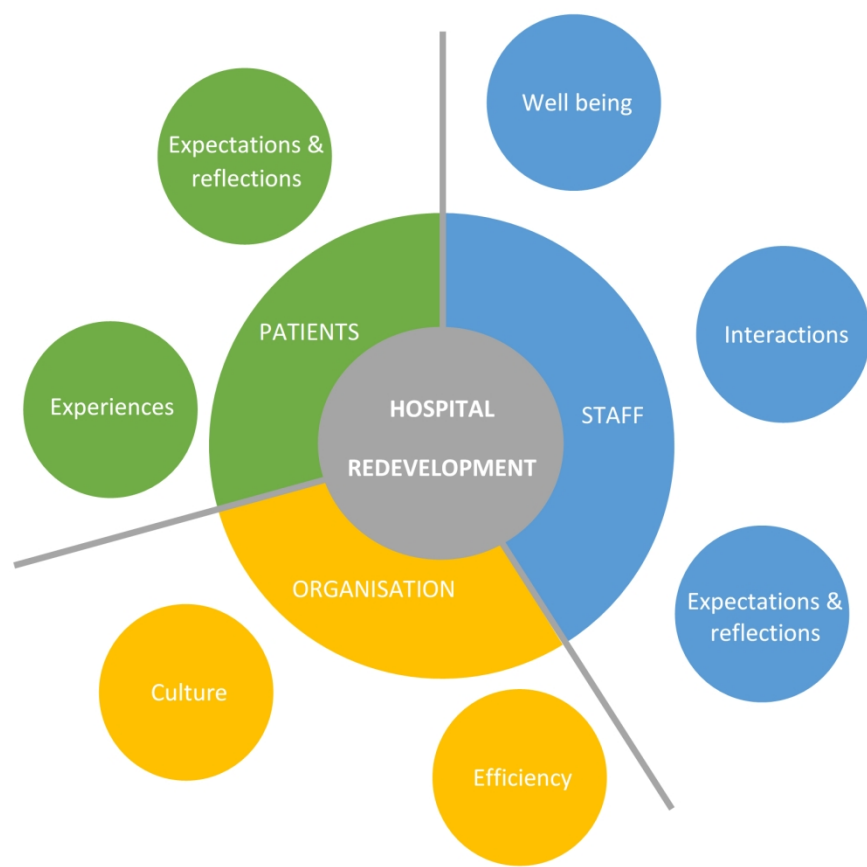

Figure 2. Domains to be assessed  
164x148mm (300 x 300 DPI)

# BMJ Open

## Exploring the ripple effects of an Australia hospital redevelopment: A protocol for a longitudinal, mixed-methods study

|                                 |                                                                                                                                                                                                                                                                                                                                                                                                                                                                                                                                                                                                                                                                                                                                                                                                                                                                                                     |
|---------------------------------|-----------------------------------------------------------------------------------------------------------------------------------------------------------------------------------------------------------------------------------------------------------------------------------------------------------------------------------------------------------------------------------------------------------------------------------------------------------------------------------------------------------------------------------------------------------------------------------------------------------------------------------------------------------------------------------------------------------------------------------------------------------------------------------------------------------------------------------------------------------------------------------------------------|
| Journal:                        | <i>BMJ Open</i>                                                                                                                                                                                                                                                                                                                                                                                                                                                                                                                                                                                                                                                                                                                                                                                                                                                                                     |
| Manuscript ID                   | bmjopen-2018-027186.R2                                                                                                                                                                                                                                                                                                                                                                                                                                                                                                                                                                                                                                                                                                                                                                                                                                                                              |
| Article Type:                   | Protocol                                                                                                                                                                                                                                                                                                                                                                                                                                                                                                                                                                                                                                                                                                                                                                                                                                                                                            |
| Date Submitted by the Author:   | 09-Apr-2019                                                                                                                                                                                                                                                                                                                                                                                                                                                                                                                                                                                                                                                                                                                                                                                                                                                                                         |
| Complete List of Authors:       | Pomare, Chiara; Macquarie University, Australian Institute of Health Innovation, Centre for Healthcare Resilience and Implementation Science<br>Churruca, Kate; Macquarie University, Australian Institute of Health Innovation, Centre for Healthcare Resilience and Implementation Science<br>Long , Janet; Macquarie University, Australian Institute of Health Innovation, Centre for Healthcare Resilience and Implementation Science<br>Ellis, Louise A.; Macquarie University, Australian Institute of Health Innovation, Centre for Healthcare Resilience and Implementation Science<br>Gardiner, Brett; Macquarie University, Australian Institute of Health Innovation, Centre for Healthcare Resilience and Implementation Science<br>Braithwaite, Jeffrey; Macquarie University, Australian Institute of Health Innovation, Centre for Healthcare Resilience and Implementation Science |
| <b>Primary Subject Heading</b>: | Health services research                                                                                                                                                                                                                                                                                                                                                                                                                                                                                                                                                                                                                                                                                                                                                                                                                                                                            |
| Secondary Subject Heading:      | Health services research, Qualitative research, Research methods                                                                                                                                                                                                                                                                                                                                                                                                                                                                                                                                                                                                                                                                                                                                                                                                                                    |
| Keywords:                       | Health & safety < HEALTH SERVICES ADMINISTRATION & MANAGEMENT, HEALTH SERVICES ADMINISTRATION & MANAGEMENT, Quality in health care < HEALTH SERVICES ADMINISTRATION & MANAGEMENT, QUALITATIVE RESEARCH, STATISTICS & RESEARCH METHODS                                                                                                                                                                                                                                                                                                                                                                                                                                                                                                                                                                                                                                                               |
|                                 |                                                                                                                                                                                                                                                                                                                                                                                                                                                                                                                                                                                                                                                                                                                                                                                                                                                                                                     |

SCHOLARONE™  
Manuscripts

1  
2  
3  
4  
5  
6  
7  
8  
9 **Exploring the ripple effects of an Australia hospital redevelopment: A protocol for a longitudinal,**  
10 **mixed-methods study**  
11  
12  
13

14 Chiara Pomare\*<sup>1</sup>

15 Kate Churruca<sup>1</sup>

16 Janet C Long<sup>1</sup>

17 Louise A Ellis<sup>1</sup>

18 Brett Gardiner<sup>1</sup>

19 Jeffrey Braithwaite<sup>1</sup>

20  
21  
22  
23  
24  
25  
26  
27  
28  
29  
30 <sup>1</sup>Centre for Healthcare Resilience and Implementation Science, Australian Institute of Health  
31 Innovation, Macquarie University.  
32

33  
34  
35  
36 \*Corresponding author:

37 Ms Chiara Pomare

38 75 Talavera Rd

39 Email: [chiara.pomare@mq.edu.au](mailto:chiara.pomare@mq.edu.au)

40 Phone: 0438 628 690  
41  
42  
43  
44  
45  
46  
47  
48  
49

50 Word count: 2,917  
51  
52  
53  
54  
55  
56  
57  
58  
59  
60

## ARTICLE SUMMARY

### Introduction

Hospital redevelopment projects typically intend to improve hospital functioning and modernise the delivery of care. There is research support for the proposition that redevelopment along evidence-based design principles can lead to improved quality and safety. However, it is not clear how redevelopment influences the wider context of the hospital and its functioning. That is, beyond a limited examination of intended outcomes (e.g. improved patient satisfaction), are there additional consequences (positive, negative, or unintended) occurring within the hospital after the physical environment is changed? Is new always better? The primary purpose of this study is to explore the ripple effects of how hospital redevelopment may influence the organisation, staff and patients in both intended and unintended ways.

### Methods and analysis

We propose to conduct a longitudinal, mixed-methods, case-study of a large metropolitan hospital in Australia. The study design consists of a series of measurements over time that are interrupted by the natural intervention of a hospital redevelopment. How hospital redevelopment influences the wider context of the hospital will be assessed in six domains: expectations and reflections of hospital redevelopment, organisational culture, staff interactions, staff wellbeing, efficiency of care delivery, and patient experience. Methods of data collection include: a hospital-wide staff survey, semi-structured interviews, a network survey, a patient experience survey, analysis of routinely-collected hospital data, and observations. In addition to a hospital-level analysis, a total of four wards will be examined in-depth, with two acting as controls. Data will be analysed using thematic, statistical, and network analyses respectively, for the qualitative, quantitative, and relational data.

### Ethics and dissemination

The study has been reviewed and approved by the relevant Ethics Committee in New South Wales, Australia. The results will be actively disseminated through peer-reviewed journals, conference presentations, and in report format to the stakeholders.

### Strengths and limitations of this study

- This study will be the first of its kind to explore how hospital redevelopment may influence the organisation, staff and patients in both intended and unintended ways.
- The project design, including the development of tools, was conducted in collaboration with the hospital under investigation.
- A key strength of the study is the use of mixed-methods and multiple time points of data collection.
- A limitation of the study is that findings may be specific to the hospital and the wards under investigation.

## Exploring the ripple effects of an Australia hospital redevelopment: A protocol for a longitudinal, mixed-methods study

### BACKGROUND

Healthcare systems worldwide are facing significant challenges to their long-term sustainability and the delivery of safe, effective, quality care.[1-3] Ageing populations, increasing costs of medical advances, issues with health workforce retention, outdated and inadequate infrastructure, concerns about the quality and safety of health services, and wasteful spending are some of the many challenges facing contemporary healthcare systems.[1, 4, 5] For hospitals, as healthcare institutions providing in-patient treatment 24 hours a day, seven days a week, one of their major challenges lies with ageing populations and overall population growth. Indeed, hospitals worldwide are experiencing a higher incidence of elderly people with greater demand for hospital services and hospital beds.[4, 6]. One way to respond to this challenge is through hospital expansion, redevelopment and modernisation.

The redevelopment of hospitals in high-income countries appears to be increasingly common,[e.g. 7, 8] for several reasons. First, hospitals must evolve and adapt to match the changing healthcare needs of the communities they service.[9] Hospitals everywhere are challenged to meet the demands of ageing populations and overall population growth; expansion through hospital redevelopment is a way to resolve consequent issues such as inadequate infrastructure. Second, hospitals must adapt to changing trends and technological advances in medicine. For example, the use of mechanical lifters at the bedside,[10] or point-of-care testing,[11] may require reconfiguration of beds in the ward. Third, hospital redevelopment may take place when existing infrastructure is found to compromise staff safety or infection control for patients. For example, the redevelopment of operating theatres to include laminar flow was a deliberate strategy aimed at reducing infection rates.[12] Another reason for hospital redevelopment lies in the well-documented association between an aesthetically appealing hospital environment and positive outcomes.[13-16] To this end, stakeholders may make design decisions on the basis of evidence, to improve not only the physical appearance, but the functioning of the hospital, including: improved quality of care, patient and staff satisfaction, and financial savings.[13]

While the literature suggests that redevelopment projects and the implementation of new design features in hospitals are associated with improved outcomes for staff, patients, and the broader organisation,[17] these outcomes have mainly been addressed in a linear frame. This means hospital redevelopment has typically been assessed by evaluating how one feature (e.g. a new garden) impacts one intended outcome (e.g. satisfaction), rather than exploring possible unintended consequences of changing the hospital system. Further, there has been a focus on physical change, rather than the behavioural, cultural or social shifts characteristic of organisational change.[18] As the physical environment of the hospital is altered, other social processes may be unintendedly influenced, for example, roles, responsibilities, culture, and the way staff work together. Indeed, past research has revealed that the behaviours and social interactions of staff are influenced by the physical healthcare environment. This was shown for formal teamwork and communication[19] as well as informal communication patterns such as support and



1  
2  
3 socialization.[20, 21] An example of a ripple effect is that beneficial working relationships between  
4 adjacent units may be disrupted if they move apart, possibly leading to poorer quality of patient  
5 care. This suggests that there is a need for a more indepth examination of the potential ripple  
6 effects of a hospital redevelopment, beyond the physical changes.  
7  
8

9  
10 This is particularly important given how interconnected and complex hospital systems are.[22, 23]  
11 Healthcare and healthcare organisations have been described as complex adaptive systems,  
12 characterised by non-linear and often unpredictable processes.[24, 25] In introducing a potentially  
13 large long-term change (and short-term disruption) as hospital redevelopment into a complex  
14 interconnected system, this perspective highlights that we need to look beyond just the intended or  
15 desired outcomes of hospital redevelopment. In taking a complex systems perspective to examine  
16 how redevelopment may influence the hospital, we recognise that we cannot isolate single factors  
17 (e.g. patient satisfaction). Rather, we need to consider the influence on many complex and  
18 interconnected levels and agents of the hospital system.[17] This perspective aligns with recent  
19 moves to re-appraise change management theory – to one that no longer perceives organisational  
20 change as planned, uniform and predictable, but an emergent process in a multi-layered, complex  
21 ecosystem that is driven as much from the bottom up as the top down.[26]  
22  
23  
24  
25

26 Therefore, rather than assuming that the redevelopment of hospitals will only lead to a particular  
27 intended outcome, we argue there is a need to consider the unintended ripple effects and  
28 widespread influences of introducing an organisational change into this complex system. Based on  
29 these issues, we pose the question: is new always better? Beyond the targeted outcome of  
30 improving the physical infrastructure, do we really know what happens within the hospital after the  
31 physical environment is comprehensively changed?  
32  
33  
34

## 35 **METHODS AND ANALYSIS**

### 36 **Study aim**

37  
38 The present research aims to explore how hospital redevelopment influences the wider context of  
39 the hospital and its functioning. In particular, the study will explore how hospital redevelopment  
40 may influence the organisation, staff and patients in both intended and unintended ways.  
41  
42  
43  
44

### 45 **Study design**

46  
47 We propose to conduct a pragmatic, longitudinal, mixed-methods case-study of a large  
48 metropolitan hospital in Australia. As illustrated in Figure 1, the design is a mixture of pre-post data  
49 collection points and a series of measurements over time that are interrupted by the natural  
50 intervention of the hospital redevelopment (i.e. interrupted time series (ITS) data). ITS is a quasi-  
51 experimental method for assessing routinely collected data over evenly spaced out intervals to  
52 assess the impact of change.[27] The combination of these methods of data collection allows for a  
53 rich and dynamic exploration of how hospital redevelopment influences the organisation, staff and  
54 patients, in intended and unintended ways.  
55  
56  
57  
58  
59  
60

1  
2  
3 INSERT FIGURE 1 HERE  
4  
5  
6  
7

8 How hospital redevelopment influences the wider context of the hospital will be assessed at three  
9 levels: organisation, staff and patients; and six domains: expectations and reflections,  
10 organisational culture (i.e. shared beliefs and attitudes), staff interactions, staff wellbeing,  
11 efficiency of care delivery and patient experience (Figure 2). These domains are underpinned by  
12 considerations of key literature [13, 14] and will be captured by six methods of data collection:  
13 hospital-wide staff survey, semi-structured interviews, network survey, patient experience survey,  
14 analysis of routinely-collected hospital data, and observations (Table 1). Of these six methods, two  
15 (hospital data and patient experience) will be assessed at a minimum of six observations points. The  
16 other four methods of data collection will be assessed at two time points, pre- and post- the  
17 intervention of hospital redevelopment. Data collection, particularly for interviews, network survey,  
18 and observations, will occur in a sequential manner (e.g. design of the network survey depends on  
19 the analysis of interview data).  
20  
21  
22  
23  
24  
25  
26  
27  
28  
29  
30  
31  
32  
33  
34  
35  
36  
37  
38  
39  
40  
41  
42  
43  
44  
45  
46  
47  
48  
49  
50  
51  
52  
53  
54  
55  
56  
57  
58  
59  
60

INSERT FIGURE 2 HERE

**Table 1.** Domains to be assessed and corresponding methods

| Method                     | Domains                    |                        |                    |                 |            |                    |
|----------------------------|----------------------------|------------------------|--------------------|-----------------|------------|--------------------|
|                            | Expectations & reflections | Organisational culture | Staff interactions | Staff wellbeing | Efficiency | Patient experience |
| Hospital-wide staff survey |                            | x                      |                    | x               |            |                    |
| Semi-structured interviews | x                          | x                      | x                  |                 |            |                    |
| Network survey             | x                          | x                      | x                  | x               |            |                    |
| *Patient experience survey | x                          |                        |                    |                 |            | x                  |
| *Hospital data             |                            |                        |                    |                 | x          | x                  |
| Observations               |                            |                        | x                  |                 | x          |                    |

\* Data captured at multiple time points; all other methods are captured at two time points, pre- and post-intervention.

## Study setting

The project will be conducted at a public, metropolitan hospital in New South Wales (NSW), Australia. The hospital has between 200 and 500 beds, and is currently undergoing a multimillion-dollar development to meet the growing needs of the community. The redevelopment will see the opening of a new acute services building, the relocation of several wards to this new building, increases in resources (equipment, staffing), and the adoption of new approaches: new ways of working and new e-medical systems of care delivery. These changes are set to be in place by mid-2019. This study includes both a broad analysis of hospital-level data and an in-depth analysis of four specific wards; two wards moving into the new building during the redevelopment project (Maternity and Intensive Care Unit), one ward will not be moved into the new building but will remain in its current location (Surgical), and one ward was moved to a new building two years prior (Respiratory). In essence, the wards moving are the intervention wards and those not moving act as controls. Chosen wards were equivalent in bed, and staff numbers. Although these wards differ somewhat in the type of care delivered, they are deemed to be sufficiently homogeneous; they were chosen in discussion with hospital executives, to cover wards undergoing and not undergoing redevelopment during the study.

## Study procedures

Routinely-collected hospital data

1  
2  
3 Routinely collected hospital data, such as throughput rates and bed occupancy, will be made  
4 accessible to the research team. This hospital data will be used to explore efficiency as an indicator  
5 of change at the hospital- and ward-levels and make inferences about how hospital redevelopment  
6 influences the efficiency of care delivery. This data will be captured at equal monthly intervals,  
7 forming part of the ITS analysis.  
8  
9

#### 10 Patient experience survey

11  
12  
13 Patient experience data will be captured using a hospital platform already in place. At present, the  
14 hospital under investigation has an online survey platform to collect patient experience data, which  
15 can be analysed on the ward level. The present project will tap into this platform in order to explore  
16 how hospital redevelopment influences patient experience. The questions asked are routinely  
17 collected and used to examine overall experience of hospital care. The survey will include the  
18 previously validated short form Picker Patient Experience Questionnaire-15 (PPE-15) for measuring  
19 patient perceived quality of hospitalization. PPE-15 measures patients' subjective experience of  
20 care during their hospital stay.[28] This survey data will be collected at multiple time points, for ITS  
21 analysis.  
22  
23  
24

#### 25 Hospital-wide staff survey

26  
27  
28 In NSW, Australia, employees working in the public sector, including public hospitals, are invited to  
29 participate in the 'People Matter Employee Survey'; a validated survey where employees can  
30 express their views and experiences in their workplace.[29] Survey findings are demarcated by  
31 agency, such as by each hospital in the NSW public sector (including the hospital under  
32 investigation). The survey is distributed and completed annually over a one-month period. The  
33 response rate of the last annual survey for this hospital was 39%, slightly higher than the relevant  
34 local health district and an increase over previous years. Survey responses will be made accessible  
35 to the research team in aggregated, unidentifiable form. This data will be analysed and used to  
36 understand the changes in attitudes and experiences of all hospital staff, at two timepoints, pre-  
37 and post- the redevelopment.  
38  
39  
40

#### 41 Semi-structured interviews

42  
43  
44 Semi-structured interviews were chosen because they enable an in-depth understanding of a new  
45 area with little previous research.[30] The purpose of the interviews before the intervention will be  
46 to collect information on: (1) a detailed understanding of the hospital's culture and current ways of  
47 working; (2) the expectations of hospital staff regarding how the ongoing hospital redevelopment  
48 might influence their work; (3) any uncertainties they had about the hospital redevelopment  
49 project, and (4) staff predictions of how ways of working with other staff might change in light of  
50 the redevelopment. The questions for the interviews taking place after the intervention will be  
51 similar, but with a focus on reflections on the change, and perceptions of how the hospital  
52 redevelopment may have influenced them personally, other staff, culture, and ways of working  
53 together. Participants eligible for inclusion in the interviews will be all staff working on the four  
54 wards under investigation, either part-time or full-time. By all staff we mean clinicians,  
55 administrative, managerial, and domestic staff. By collecting diverse staff perspectives we can shed  
56 light on how different types and levels of hospital staff may be influenced by the redevelopment.  
57  
58  
59  
60

1  
2  
3 The number of interview participants will be approximately 40 (at each time point), with a  
4 minimum of 10 participants per ward or until data saturation is reached. Semi-structured interviews  
5 will be conducted by the first author in private settings at the participants' place of work (in ward  
6 interview rooms or private offices). At times where participants are unable to meet the researcher  
7 in person, interviews will be conducted over the phone in similar private settings. Findings from  
8 these interviews will be used to develop the subsequent network survey and observational  
9 component of the research.  
10  
11  
12

### 13 Network survey

14  
15  
16 Surveys are a common tool of data collection used to understand the attitudes and perceptions of  
17 professionals working in health services;[31] in this case, all types of staff working in the hospital  
18 under redevelopment. Questions in this survey will be partly dependent upon the analysis of  
19 interview data.  
20

#### 21 *Part 1: Demographics and other factors*

22  
23  
24 The first part of the survey will be used to collect demographic data and expectations and  
25 reflections on the hospital redevelopment project. Existing validated measures will be used to  
26 examine organisational culture,[32] measures of staff wellbeing (such as job satisfaction,[33]  
27 burnout,[34] intention to leave[35]), and readiness for organisational change.[36] The same set of  
28 questions will be used pre- and post- the intervention.  
29  
30

#### 31 *Part 2: Social network survey*

32  
33  
34 Part 2 of the survey will consist of a social network survey. Social network research involves the  
35 investigation of social structures such as collaboration, through the use of networks and graph  
36 theory.[37] This provides a basis to investigate a range of collaborative issues, including silo-  
37 working and bottlenecks in communication flow,[38] in order to explore how hospital  
38 redevelopment influences patterns of staff interaction. The collection of network data to assess  
39 interactions is an established tool[38] used in previous healthcare research.[39, 40] In this part of  
40 the survey, staff will be asked to report which staff members they work with most closely. Given  
41 the sequential nature of the study design, the exact wording of the network questions is dependent  
42 on the interview findings. The survey will be similar after the intervention, with the exception of  
43 additional open-ended questions asking how patterns of interaction may have changed in response  
44 to the hospital redevelopment project.  
45  
46  
47  
48

### 49 Observations

50  
51  
52 Generally speaking, observational data will be used to provide a rich description of how hospital  
53 redevelopment influences the ways staff work together. Observational data collection will be  
54 complementary to the quantitative data of the network survey and will add explanatory value to  
55 understanding how the hospital system may change and evolve over time in response to  
56 redevelopment. Using observations in conjunction with social network research, as well as in  
57 healthcare research more broadly, helps illuminate taken-for-granted and unintended aspects of  
58 collaboration that may not be disclosed in surveys or other forms of data collection.[41]  
59  
60

1  
2  
3 Observations will also provide rich data relating to the culture on the wards and how it might be  
4 influenced by redevelopment, which is otherwise difficult to capture in self-report questionnaires.  
5 The observations will include all types of hospital staff (clinical and non-clinical). Given the  
6 sequential nature of this study, specific observational methods will be designed based on interview  
7 and survey findings.  
8  
9

## 10 **Data analyses**

11  
12  
13 Interview and observational data will be analysed using the qualitative method of thematic  
14 analysis,[42] using an open coding process[43]. Data collection and analysis will occur iteratively;  
15 questions used for interviews and guides for observations will be continuously refined and  
16 expanded in light of emerging findings. Qualitative data will be analysed using NVivo, Version 11.4,  
17 for coding and qualitative data analysis.  
18  
19

20  
21 For quantitative analysis, demographic and descriptive data (staff wellbeing, organisational culture)  
22 collected from the network survey, will be analysed using SPSS Statistics Version 22.0. Relational  
23 data from the network survey will be graphically presented using Gephi 0.9.2 software, and  
24 analysed using stochastic actor-based models.[44] These social network analysis techniques include  
25 the analysis of endogenous (structural, network self-organisation) and exogenous (individual  
26 characteristics) variables. Trends in time series data will be graphically presented using line graphs,  
27 and statistically analysed using segmented regression analysis on SPSS.  
28  
29  
30

## 31 **Integrating results**

32  
33 Qualitative, quantitative and network results from the diverse data collection methods will be  
34 integrated to form an overall picture of ways hospital redevelopment may influence the  
35 organisation, staff and patients in both intended and unintended ways. Data will be synthesised  
36 using a mixed-methods matrix:[45] a way to triangulate data and display findings emerging from  
37 each level (patient, staff, organisational) and the various methods of data collection. The matrix will  
38 delineate data for the intervention and control wards to allow for comparison. Data will be  
39 categorised as positive, negative or neutral, pre- and post-hospital redevelopment. The nature of  
40 influence will be classified as either intended or unintended (e.g. intended that patient satisfaction  
41 will increase). Classification of what changes were intended or unintended will be deduced in  
42 consultation with key stakeholders at the hospital. This will be followed by consideration of where  
43 there is agreement, partial agreement, silence, or dissonance between findings from different  
44 methods on different levels.[45]  
45  
46  
47  
48  
49

## 50 **Patient and public involvement**

51  
52 The Institute consults with patients, their representatives and the general public regularly to ensure  
53 that adequate input is secured for research projects and programs of research. A key partner is the  
54 Consumers Health Forum of Australia. Patients were not directly involved in the development of  
55 the research question, study design, recruitment or conduct of the study. However, the staged  
56 nature of the study design means that concerns raised by patients in the survey before the  
57 intervention can be used to refine research questions and methods to assess the effects of hospital  
58  
59  
60

1  
2  
3 redevelopment once the move into the new hospital building takes place. At the end of the study,  
4 final results will be disseminated broadly to patients and the wider public.  
5

## 6 7 **DISCUSSION**

8  
9 This study seeks to explore a significant gap in the literature, namely, how redevelopment  
10 influences the wider context of the hospital and its functioning. This research is timely as hospital  
11 redevelopment projects are ubiquitous and on the rise.[e.g. 7, 8] The exploratory nature of this  
12 case-study enables the identification of unintended influences, positive or negative, that come from  
13 conducting a redevelopment project in the hospital physical environment. The study looks at social,  
14 behavioural and cultural changes that may come as a result of the physical change (e.g. teamwork  
15 and culture). If unintended consequences of hospital redevelopment on the organisation, staff and  
16 patients are revealed, then we may be able to delineate and propose ways to deal with these  
17 factors. These findings may be used to guide policies on how to implement major hospital  
18 redevelopment projects with minimal disruption and awareness of the intended and unintended  
19 effects of this large change.  
20  
21  
22  
23

24  
25 As to limitations, the findings may not be generalisable to all instances of hospital redevelopment  
26 and may be specific to the four wards and one hospital examined in this study. They were  
27 purposively chosen rather than randomised. While findings may not be generalisable, the  
28 qualitative test is credibility and the protocol has been designed to optimise research credibility at  
29 each point. This in-depth case-study provides the opportunity to uncover theoretical insights into  
30 the processes of change in the healthcare system and how such processes can impact staff,  
31 patients, and the organisation. Another potential limitation lies in the two time-point data  
32 collection for four or the six methods of this study. Detected changes assessed by these methods  
33 can, in some instances, be affected by numerous other factors, such as, seasonal, auto-correlational  
34 and non-stationary biases often found in two-time point longitudinal data.[27] In including ITS data  
35 and control wards, this limitation will be addressed as such biases can be identified when there are  
36 numerous time points and varied contexts. Therefore, the combination of pre-post and ITS data  
37 collection along with multi-level analysis of the complex hospital system is beneficial in the  
38 exploration of unintended influences to answer the question: is new always better?  
39  
40  
41  
42  
43

## 44 **ETHICS AND DISSEMINATION**

45  
46 The study has been reviewed and approved by the relevant Ethics Committee in NSW, Australia.  
47 There are no known health or safety risks associated with participation in any aspect of the  
48 described study. The results will be actively disseminated through peer-reviewed journals,  
49 conference presentations, and in report format to the stakeholders.  
50  
51

## 52 **Author contributions**

53  
54 CP, JB and BG conceptualised the study. CP drafted the initial manuscript, assisted by KC, JL and LE.  
55 All authors contributed to the refinement of the final manuscript.  
56  
57

## 58 **Funding**

1  
2  
3 CP was funded by the Australian Government Research Training Program (RTP) PhD Scholarship. JB  
4 is supported by multiple grants, including the National Health and Medical Research Council  
5 (NHMRC) Partnership Grant for Health Systems Sustainability (ID: 9100002).  
6  
7

### 8 **Competing Interests**

9

10 None declared.  
11  
12

### 13 **Data availability**

14

15 There are no data in this work.  
16  
17

### 18 **Abbreviations**

19

20 NSW New South Wales  
21  
22 ITS Interrupted time series  
23  
24 RTP Research training program  
25  
26  
27  
28  
29  
30  
31  
32  
33  
34  
35  
36  
37  
38  
39  
40  
41  
42  
43  
44  
45  
46  
47  
48  
49  
50  
51  
52  
53  
54  
55  
56  
57  
58  
59  
60



## References

1. World Health Organization. Everybody's business: strengthening health systems to improve health outcomes: WHO's framework for action. Geneva, Switzerland: WHO; 2007.
2. Braithwaite J, Mannion R, Matsuyama Y, Shekelle PG, Whittaker S, Al-Adawi S. Health systems improvement across the globe: success stories from 60 countries. Boca Raton, FL: CRC Press; 2017.
3. Braithwaite J, Matsuyama Y, Johnson J. Healthcare reform, quality and safety: perspectives, participants, partnerships and prospects in 30 countries. Surrey, UK: CRC Press; 2017.
4. Morris M. Global health care outlook: battling costs while improving care. Deloitte; 2016.
5. Braithwaite J, Mannion R, Matsuyama Y, Shekelle PG, Whittaker S, Al-Adawi S. Healthcare systems: future predictions for global care. Boca Raton, FL: CRC Press; 2018.
6. Armstrong BK, Gillespie JA, Leeder SR, Rubin GL, Russell LM. Challenges in health and health care for Australia. *Med J Aust* 2007;187(9):485.
7. Ritchie E. NSW budget 2017: 'hospital building boom' at heart of \$23bn deal. *The Australian*. 2017 June 21.
8. Carpenter D, Hoppszallern S. 2006 hospital building report. The boom goes on. *Hospitals & Health Networks* 2006;80(3):48-50, 2-4, 2.
9. McKee M, Healy J. The role of the hospital in a changing environment. *Bull World Health Organ* 2000;78:803-10.
10. SANDOZ. Changing societies, changing healthcare needs: three demographic trends shaping the future of medical services Sandoz International GmbH, 2017 [Available from: <https://www.sandoz.com/stories/system-capacity-building/changing-societies-and-healthcare-needs-three-demographic-trends>].
11. Junker R, Schlebusch H, Luppia PB. Point-of-care testing in hospitals and primary care. *Deutsches Ärzteblatt International* 2010;107(33):561.
12. McHugh S, Hill A, Humphreys H. Laminar airflow and the prevention of surgical site infection. More harm than good? *Surgeon* 2015;13(1):52-8.
13. Joseph A, Kirk Hamilton D. The Pebble Projects: coordinated evidence-based case studies. *Building Research & Information* 2008;36(2):129-45.
14. Ulrich RS, Zimring C, Zhu X, DuBose J, Seo H-B, Choi Y-S, et al. A review of the research literature on evidence-based healthcare design. *HERD* 2008;1(3):61-125.
15. Schweitzer M, Gilpin L, Frampton S. Healing spaces: elements of environmental design that make an impact on health. *J Altern Complement Med* 2004;10(Supplement 1):S-71-S-83.

16. Rechel B, Buchan J, McKee M. The impact of health facilities on healthcare workers' well-being and performance. *Int J Nurs Stud* 2009;46(7):1025-34.
17. Ulrich R, Zimring C, Quan X, Josephh A, Choudhary R. The role of the physical environment in the hospital of the 21st century: A once-in-a-lifetime opportunity. Concord, CA; 2004.
18. Burnes B. Managing change: a strategic approach to organisational dynamics. 4th ed: Prentice Hall; 2004.
19. Gharaveis A, Hamilton DK, Pati D. The impact of environmental design on teamwork and communication in healthcare facilities: a systematic literature review. *HERD* 2018;11(1):119-37.
20. Becker F. Nursing unit design and communication patterns: what is "real" work? *HERD* 2007;1(1):58-62.
21. Naccarella L, Raggatt M, Redley B. The influence of spatial design on team communication in hospital emergency departments. *HERD* 2018:1937586718800481.
22. Braithwaite J. Changing how we think about healthcare improvement. *BMJ* 2018;361:k2014.
23. Braithwaite J, Churruca K, Long JC, Ellis LA, Herkes J. When complexity science meets implementation science: a theoretical and empirical analysis of systems change. *BMC Med* 2018;16(1):63.
24. Braithwaite J, Churruca K, Ellis LA, Long JC, Clay-Williams R, Damen N, et al. Complexity Science in Healthcare-Aspirations, Approaches, Applications and Accomplishments: A White Paper. Sydney, Australia: Macquarie University; 2017.
25. Plsek PE, Greenhalgh T. Complexity science: the challenge of complexity in health care. *BMJ* 2001;323(7313):625.
26. Todnem By R. Organisational change management: a critical review. *J Change Manag* 2005;5(4):369-80.
27. Lagarde M. How to do (or not to do)... Assessing the impact of a policy change with routine longitudinal data. *Health Policy Plan* 2011;27(1):76-83.
28. Jenkinson C, Coulter A, Bruster S. The Picker Patient Experience Questionnaire: development and validation using data from in-patient surveys in five countries. *Int J Qual Health Care* 2002;14(5):353-8.
29. NSW Government. People Matter Employee Survey 2018 [Available from: <https://www.psc.nsw.gov.au/reports---data/state-of-the-sector/people-matter-employee-survey>].
30. Pope C, Ziebland S, Mays N. Qualitative research in health care. Analysing qualitative data. *BMJ* 2000;320(7227):114-6.
31. Valentine MA, Nembhard IM, Edmondson AC. Measuring teamwork in health care settings: a review of survey instruments. *Med Care* 2015;53(4):e16-e30.

- 1  
2  
3 32. Sexton JB, Helmreich RL, Neilands TB, Rowan K, Vella K, Boyden J, et al. The Safety Attitudes  
4 Questionnaire: psychometric properties, benchmarking data, and emerging research. *BMC Health*  
5 *Serv Res* 2006;6(1):44.  
6
- 7  
8 33. Bowling NA, Hammond GD. A meta-analytic examination of the construct validity of the  
9 Michigan Organizational Assessment Questionnaire Job Satisfaction Subscale. *J Vocat Behav*  
10 2008;73(1):63-77.  
11
- 12 34. Maslach C, Jackson S. The measurement of experienced burnout. *J Occup Behav* 1981;2:99-  
13 113.  
14
- 15 35. Stone PW, Larson EL, Mooney-Kane C, Smolowitz J, Lin SX, Dick AW. Organizational climate  
16 and intensive care unit nurses' intention to leave. *Crit Care Med* 2006;34(7):1907-12.  
17
- 18 36. Holt DT, Armenakis AA, Feild HS, Harris SG. Readiness for organizational change: the  
19 systematic development of a scale. *J App Behav Sci* 2007;43(2):232-55.  
20
- 21 37. Robins G. Doing social network research: network-based research design for social  
22 scientists: Sage Publishing; 2015.  
23
- 24 38. Long JC, Bishop S. Social network research. In: Liamputtong P, editor. Handbook of research  
25 methods in health social sciences. Singapore: Springer; 2018. p. 1-16.  
26
- 27 39. Long JC, Cunningham FC, Wiley J, Carswell P, Braithwaite J. Leadership in complex networks:  
28 the importance of network position and strategic action in a translational cancer research network.  
29 *Implement Sci* 2013;8(1):122.  
30
- 31 40. Chan B, Reeve E, Matthews S, Carroll PR, Long JC, Held F, et al. Medicine information  
32 exchange networks among healthcare professionals and prescribing in geriatric medicine wards.  
33 *Brit J Clin Pharmacol* 2017;83(6):1185-96.  
34
- 35 41. Lingo EL, O'Mahony S. Nexus work: Brokerage on creative projects. *Adm Sci Q*  
36 2010;55(1):47-81.  
37
- 38 42. Braun V, Clarke V. Using thematic analysis in psychology. *Qual Res Psychol* 2006;3(2):77-101.  
39
- 40 43. Newell R, Burnard P. A pragmatic approach to qualitative data analysis. In: Newell R,  
41 Burnard P, editors. Research for evidence-based practice in healthcare. 2nd ed. Hoboken, NJ: Wiley-  
42 Blackwell; 2010.  
43
- 44 44. Lusher D, Koskinen J, Robins G. Exponential random graph models for social networks:  
45 theory, methods, and applications. Cambridge, UK: Cambridge University Press; 2012.  
46
- 47 45. O'Cathain A, Murphy E, Nicholl J. Three techniques for integrating data in mixed methods  
48 studies. *BMJ* 2010;341:c4587.  
49  
50  
51  
52  
53  
54  
55  
56  
57  
58  
59  
60

1  
2  
3  
4  
5  
6  
7  
8  
9  
10  
11  
12  
13  
14  
15  
16  
17  
18  
19  
20  
21  
22  
23  
24  
25  
26  
27  
28  
29  
30  
31  
32  
33  
34  
35  
36  
37  
38  
39  
40  
41  
42  
43  
44  
45  
46  
47  
48  
49  
50  
51  
52  
53  
54  
55  
56  
57  
58  
59  
60

**FIGURE LEGENEDS**

**Figure 1.** Data collection points over time

**Figure 2.** Domains to be assessed

For peer review only



Figure 1. Data collection points over time

163x92mm (300 x 300 DPI)

1  
2  
3  
4  
5  
6  
7  
8  
9  
10  
11  
12  
13  
14  
15  
16  
17  
18  
19  
20  
21  
22  
23  
24  
25  
26  
27  
28  
29  
30  
31  
32  
33  
34  
35  
36  
37  
38  
39  
40  
41  
42  
43  
44  
45  
46  
47  
48  
49  
50  
51  
52  
53  
54  
55  
56  
57  
58  
59  
60



Figure 2. Domains to be assessed  
164x148mm (300 x 300 DPI)
